# Supplementary material for: Polyoxometalate-based ionic liquids: efficient reversible phase transformation-type catalysts for thiolation of alcohols to construct C–S bonds
Source: Royal Society of Chemistry journal article supplement (doi:10.1039/d4dt00046c), 2024-01-01
Supplement: d4dt00046c1.pdf [file d4dt00046c1.pdf]

Supporting Information for

# Polyoxometalate-Based Ionic Liquids: Efficient Reversible Phase Transformation-type Catalysts for Thiolation of Alcohols to Construct C-S Bond

Jikun Li,<sup>†</sup> Junwei Ma,<sup>†</sup> Chuanping Wei, Zebao Zheng, Yinfeng Han,<sup>\*</sup> Huiping Wang, Xueshen Wang, and Changwen Hu<sup>\*</sup>

<sup>†</sup>J. Li and J. Ma contributed equally. E-mail address: hanyf1978@163.com, cwhu@bit.edu.cn

## Table of contents

**S1.** Spectroscopic data of [MIMPS]<sub>3</sub>PW<sub>12</sub>O<sub>40</sub>, [EIMPS]<sub>3</sub>PW<sub>12</sub>O<sub>40</sub> and [PIMPS]<sub>3</sub>PW<sub>12</sub>O<sub>40</sub>.

**Table S1-S6.** Details of optimization experiments.

**Figure S1.** Quantitative standard curve used for GC.

**Figure S2-S4.** FT-IR spectra of [MIMPS]<sub>3</sub>PW<sub>12</sub>O<sub>40</sub>, [EIMPS]<sub>3</sub>PW<sub>12</sub>O<sub>40</sub> and [PIMPS]<sub>3</sub>PW<sub>12</sub>O<sub>40</sub>.

**Figure S5-S7.** NMR spectra of [MIMPS]<sub>3</sub>PW<sub>12</sub>O<sub>40</sub>, [EIMPS]<sub>3</sub>PW<sub>12</sub>O<sub>40</sub> and [PIMPS]<sub>3</sub>PW<sub>12</sub>O<sub>40</sub>.

**Figure S8-S10.** ESI-MS of [MIMPS]<sub>3</sub>PW<sub>12</sub>O<sub>40</sub>, [EIMPS]<sub>3</sub>PW<sub>12</sub>O<sub>40</sub> and [PIMPS]<sub>3</sub>PW<sub>12</sub>O<sub>40</sub>.

**Figure S11-S13.** PXRD patterns of [MIMPS]<sub>3</sub>PW<sub>12</sub>O<sub>40</sub>, [EIMPS]<sub>3</sub>PW<sub>12</sub>O<sub>40</sub> and [PIMPS]<sub>3</sub>PW<sub>12</sub>O<sub>40</sub>.

**Figure S14-S29.** NMR spectra of thioether products.

**Figure S30.** Spectroscopic data (HPLC trace).

**Figure S31.** NMR spectra of the isolated ether.

**S1.** Spectroscopic data of [MIMPS]<sub>3</sub>PW<sub>12</sub>O<sub>40</sub>, [EIMPS]<sub>3</sub>PW<sub>12</sub>O<sub>40</sub> and [PIMPS]<sub>3</sub>PW<sub>12</sub>O<sub>40</sub>.

[MIMPS]<sub>3</sub>PW<sub>12</sub>O<sub>40</sub>: Yied: 94%. FT-IR (KBr, cm<sup>-1</sup>): 3445 (br, O-H), 1627, 1568, 1462, 1210, 1167, 1082, 981, 895, 808, 615, 522. <sup>1</sup>H NMR (500 MHz, DMSO-*d*<sub>6</sub>) δ 9.13-9.08 (m, 1H), 7.81-7.74 (m, 1H), 7.71-7.67 (m, 1H), 4.30 (t, *J*=7.0 Hz, 2H), 3.85 (s, 3H), 2.45 (t, *J*=7.2 Hz, 2H), 2.09 (p, *J*=7.0 Hz, 2H). <sup>13</sup>C NMR (126 MHz, DMSO-*d*<sub>6</sub>) δ 137.19, 124.06, 122.78, 48.19, 47.76, 36.20, 26.58. Positive-ion electrospray ionization mass spectrometry (ESI-MS) *m/z*: 205.05 (MIMPS<sup>+</sup>). Negative-ion electrospray ionization mass spectrometry (ESI-MS) *m/z*: 959.72 (PW<sub>12</sub>O<sub>40</sub><sup>3-</sup>).<sup>[1]</sup>

[EIMPS]<sub>3</sub>PW<sub>12</sub>O<sub>40</sub>: Yied: 93%. FT-IR (KBr, cm<sup>-1</sup>): 3436 (br, O-H), 1628, 1558, 1454, 1202, 1160, 1083, 972, 902, 804, 594, 518. <sup>1</sup>H NMR (500 MHz, DMSO-*d*<sub>6</sub>) δ 9.19 (s, 1H), 7.80 (s, 2H), 4.30 (t, *J*=7.0 Hz, 2H), 4.20 (q, *J*=7.3 Hz, 2H), 2.45 (t, *J*=7.3 Hz, 2H), 2.11 (p, *J*=7.2 Hz, 2H), 1.43 (t, *J*=7.2 Hz, 3H). <sup>13</sup>C NMR (126 MHz, DMSO-*d*<sub>6</sub>) δ 136.32, 122.92, 122.55, 48.29, 47.83, 44.70, 26.52, 15.46. Positive-ion electrospray ionization mass spectrometry (ESI-MS) *m/z*: 219.08 (EIMPS<sup>+</sup>). Negative-ion electrospray ionization mass spectrometry (ESI-MS) *m/z*: 959.72 (PW<sub>12</sub>O<sub>40</sub><sup>3-</sup>).

[PIMPS]<sub>3</sub>PW<sub>12</sub>O<sub>40</sub>: Yied: 95%. FT-IR (KBr, cm<sup>-1</sup>): 34436 (br, O-H), 1627, 1559, 1455, 1209, 1165, 1084, 985, 904, 811, 595, 510. <sup>1</sup>H NMR (500 MHz, DMSO-*d*<sub>6</sub>) δ 9.20 (d, *J*=1.7 Hz, 1H), 7.84-7.77 (m, 2H), 4.30 (t, *J*=7.0 Hz, 2H), 4.13 (t, *J*=7.1 Hz, 2H), 2.43 (t, *J*=7.2 Hz, 2H), 2.10 (tt, *J*=7.0 Hz, *J*=7.2 Hz, 2H), 1.82 (h, *J*=7.3 Hz, 2H), 0.85 (t, *J*=7.4 Hz, 3H). <sup>13</sup>C NMR (126 MHz, DMSO-*d*<sub>6</sub>) δ 136.67, 123.01, 122.88, 50.80, 48.32, 47.81, 26.59, 23.23, 10.90. Positive-ion electrospray ionization mass spectrometry (ESI-MS) *m/z*: 233.10 (PIMPS<sup>+</sup>). Negative-ion electrospray ionization mass spectrometry (ESI-MS) *m/z*: 959.72 (PW<sub>12</sub>O<sub>40</sub><sup>3-</sup>).

**Table S1.** Optimization of types of catalysts for the reaction of 2-phenyl-2-propanol and 4-fluorobenzenethiol.<sup>a</sup>

| Entry | Catalyst                                              | Yield (%) <sup>b</sup> |
|-------|-------------------------------------------------------|------------------------|
| 1     | [MIMPS] <sub>3</sub> PW <sub>12</sub> O <sub>40</sub> | 91.8                   |
| 2     | [EIMPS] <sub>3</sub> PW <sub>12</sub> O <sub>40</sub> | 92.5                   |
| 3     | [PIMPS] <sub>3</sub> PW <sub>12</sub> O <sub>40</sub> | 97.5                   |

Reaction conditions: 2-phenyl-2-propanol (0.6 mmol), thiols (0.5 mmol), catalyst (5 mol%, molar ratio based on thiol and PW<sub>12</sub>O<sub>40</sub><sup>3-</sup>), 70 °C, 2 mL acetonitrile, 1 h. <sup>b</sup>GC yield, biphenyl as internal standard.

**Table S2.** Optimization of the loading of [PIMPS]<sub>3</sub>PW<sub>12</sub>O<sub>40</sub> for the reaction of 2-phenyl-2-propanol and 4-fluorobenzenethiol.<sup>a</sup>

| Entry | Catalyst loading (%) | Yield (%) <sup>b</sup> |
|-------|----------------------|------------------------|
| 1     | Blank                | NR                     |
| 2     | 3                    | 95.8                   |
| 3     | 5                    | 97.5                   |
| 4     | 7                    | 98.7                   |

Reaction conditions: 2-phenyl-2-propanol (0.6 mmol), thiols (0.5 mmol), [PIMPS]<sub>3</sub>PW<sub>12</sub>O<sub>40</sub> (molar ratio based on thiol and PW<sub>12</sub>O<sub>40</sub><sup>3-</sup>), 70 °C, 2 mL acetonitrile, 1 h. <sup>b</sup>GC yield, biphenyl as internal standard.

**Table S3.** Optimization of temperature for the reaction of 2-phenyl-2-propanol and 4-fluorobenzenethiol.<sup>a</sup>

| Entry | Temperature (°C) | Yield (%) <sup>b</sup> |
|-------|------------------|------------------------|
| 1     | 25 (r.t.)        | 61.2                   |
| 2     | 50               | 80.6                   |
| 3     | 70               | 97.5                   |
| 4     | 90               | 98.2                   |

Reaction conditions: 2-phenyl-2-propanol (0.6 mmol), thiols (0.5 mmol), [PIMPS]<sub>3</sub>PW<sub>12</sub>O<sub>40</sub> (5 mol%, molar ratio based on thiol and PW<sub>12</sub>O<sub>40</sub><sup>3-</sup>), 2 mL acetonitrile, 1 h. <sup>b</sup>GC yield, biphenyl as internal standard.

**Table S4.** Optimization of the solvent used for the reaction of 2-phenyl-2-propanol and 4-fluorobenzenethiol.<sup>a</sup>

| Entry | Solvent                         | Yield (%) <sup>b</sup> |
|-------|---------------------------------|------------------------|
| 1     | CH <sub>2</sub> Cl <sub>2</sub> | 40.6                   |
| 2     | CH <sub>3</sub> OH              | < 5                    |
| 3     | CH <sub>3</sub> CN              | 97.5                   |

Reaction conditions: 2-phenyl-2-propanol (0.6 mmol), thiols (0.5 mmol), [PIMPS]<sub>3</sub>PW<sub>12</sub>O<sub>40</sub> (5 mol%, molar ratio based on thiol and PW<sub>12</sub>O<sub>40</sub><sup>3-</sup>), 70 °C, 1 h. <sup>b</sup>GC yield, biphenyl as internal standard.

**Table S5.** Optimization of the time for the reaction of 2-phenyl-2-propanol and 4-fluorobenzenethiol.<sup>a</sup>

| Entry | Time (h) | Yield (%) <sup>b</sup> |
|-------|----------|------------------------|
| 1     | 0.5      | 94.4                   |
| 2     | 1        | 97.5                   |
| 3     | 1.5      | 98.4                   |

Reaction conditions: 2-phenyl-2-propanol (0.6 mmol), thiols (0.5 mmol), [PIMPS]<sub>3</sub>PW<sub>12</sub>O<sub>40</sub> (5 mol%, molar ratio based on thiol and PW<sub>12</sub>O<sub>40</sub><sup>3-</sup>), 70 °C, 2 mL acetonitrile. <sup>b</sup>GC yield, biphenyl as internal standard.

**Table S6.** Optimization of the molar ratio of 2-phenyl-2-propanol and 4-fluorobenzenethiol.<sup>a</sup>

| Entry | Molar ratio (alcohol/thiol) | Yield (%) <sup>b</sup> |
|-------|-----------------------------|------------------------|
| 1     | 1:1 (alcohol 0.5 mmol)      | 93.5                   |
| 2     | 1.2:1 (alcohol 0.6 mmol)    | 97.5                   |

Reaction conditions: [PIMPS]<sub>3</sub>PW<sub>12</sub>O<sub>40</sub> (5 mol%, molar ratio based on thiol and PW<sub>12</sub>O<sub>40</sub><sup>3-</sup>), 70 °C, 2 mL acetonitrile, 1 h. <sup>b</sup>GC yield, biphenyl as internal standard.

**Figure S1.** Quantitative standard curve used for GC.

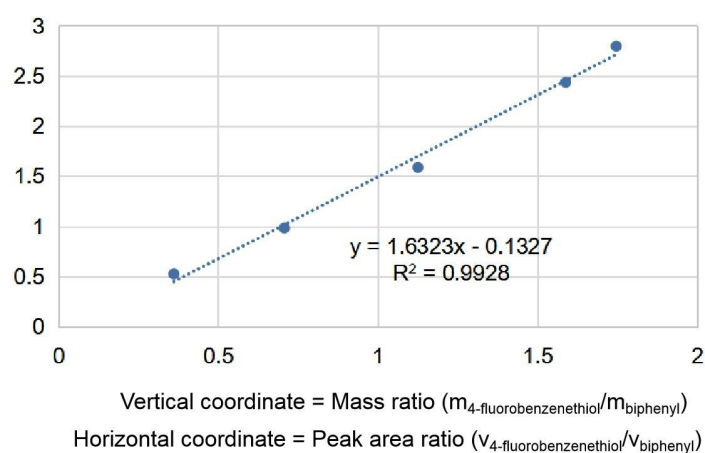

**Figure S2.** FT-IR spectra of [MIMPS]<sub>3</sub>PW<sub>12</sub>O<sub>40</sub>.

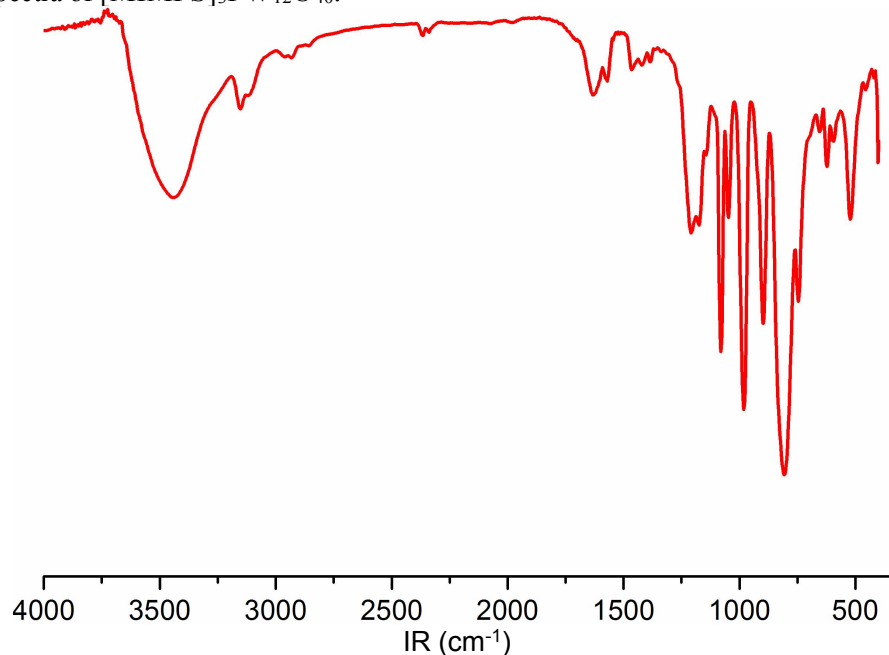

**Figure S3.** FT-IR spectra ( $\text{cm}^{-1}$ ) of  $[\text{EIMPS}]_3\text{PW}_{12}\text{O}_{40}$ .

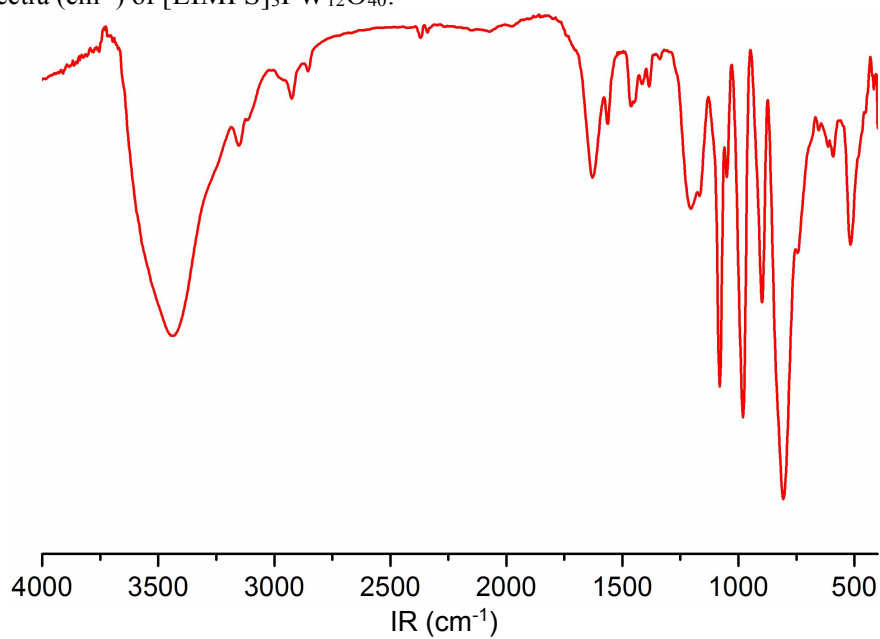

**Figure S4.** FT-IR spectra ( $\text{cm}^{-1}$ ) of  $[\text{PIMPS}]_3\text{PW}_{12}\text{O}_{40}$ .

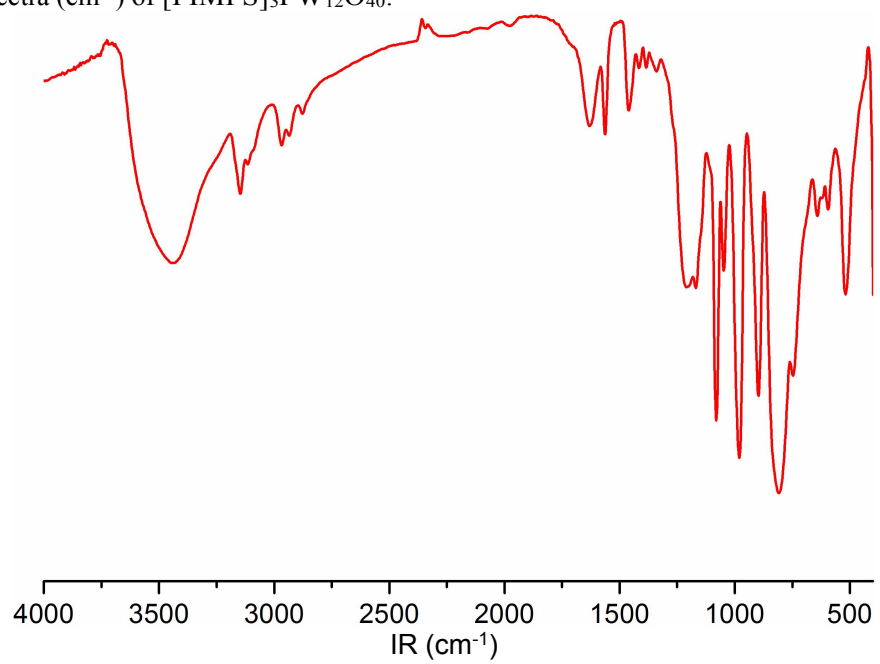

Figure S5. NMR spectra of [MIMPS]<sub>3</sub>PW<sub>12</sub>O<sub>40</sub>.

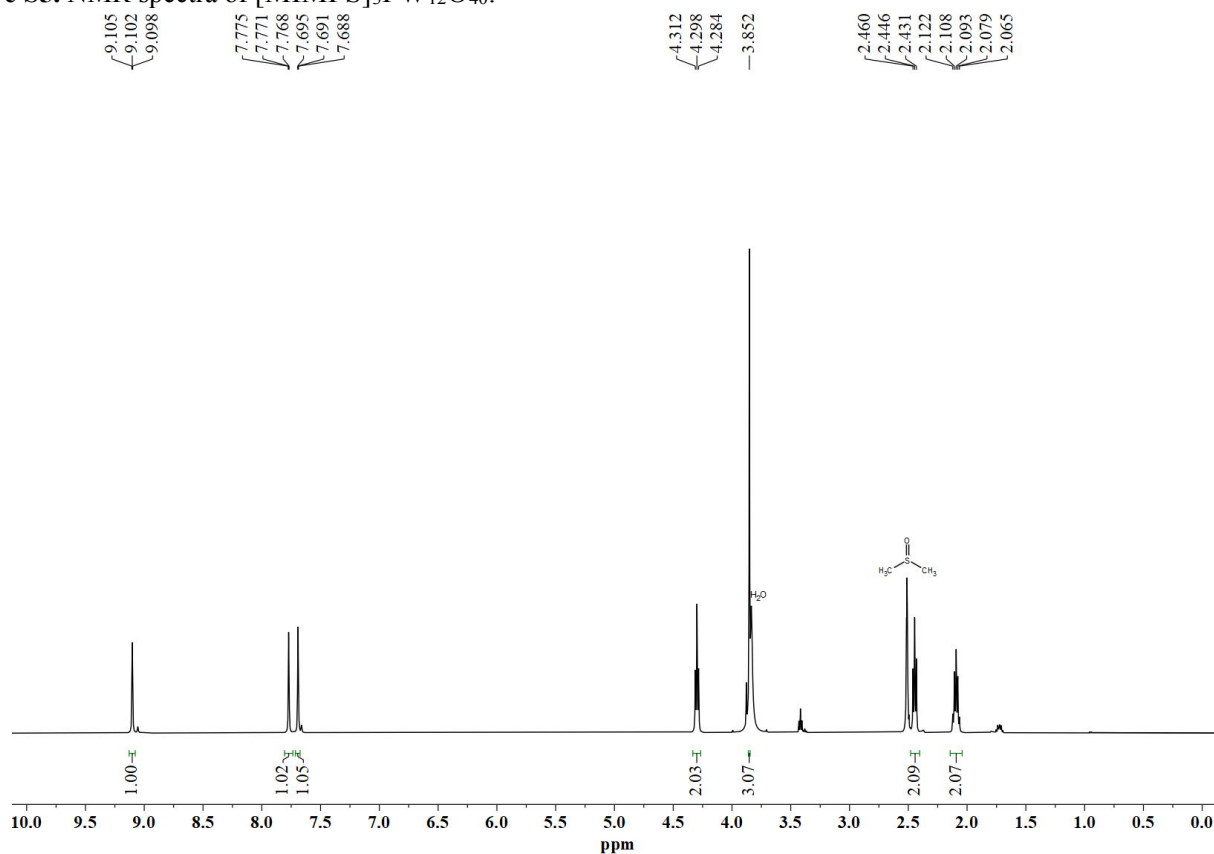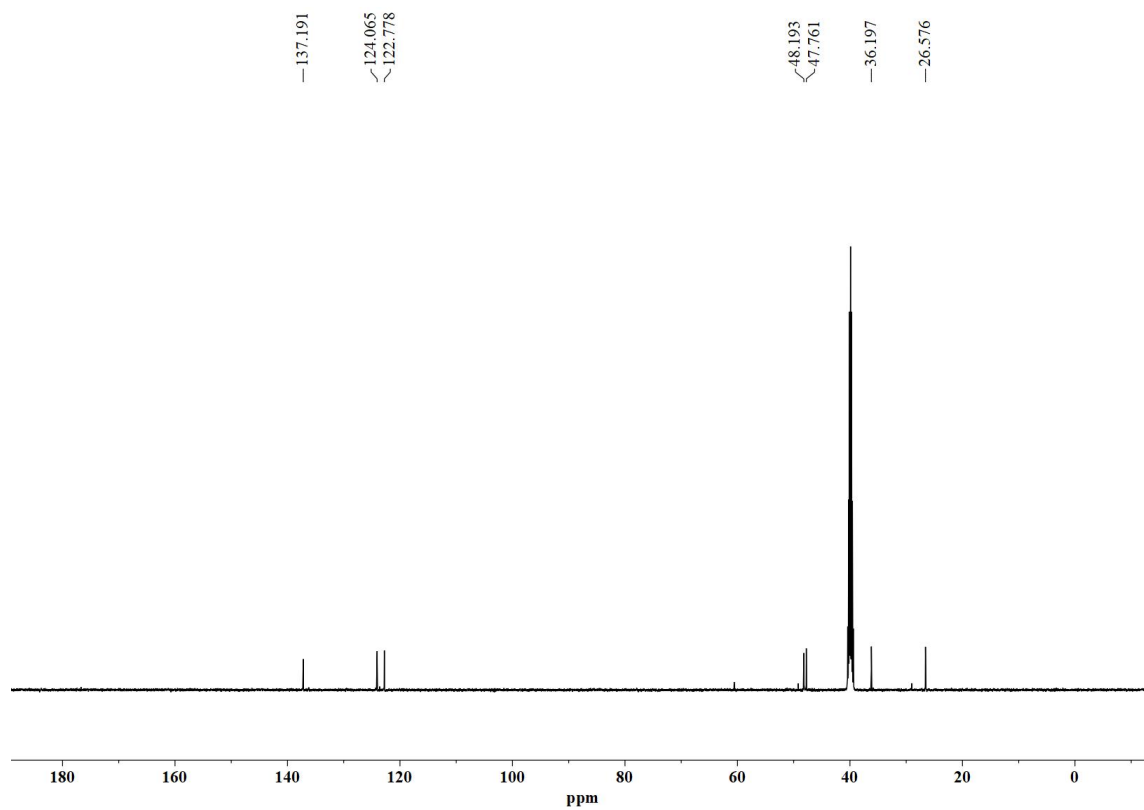

**Figure S6.** NMR spectra of  $[\text{EIMPS}]_3\text{PW}_{12}\text{O}_{40}$ .

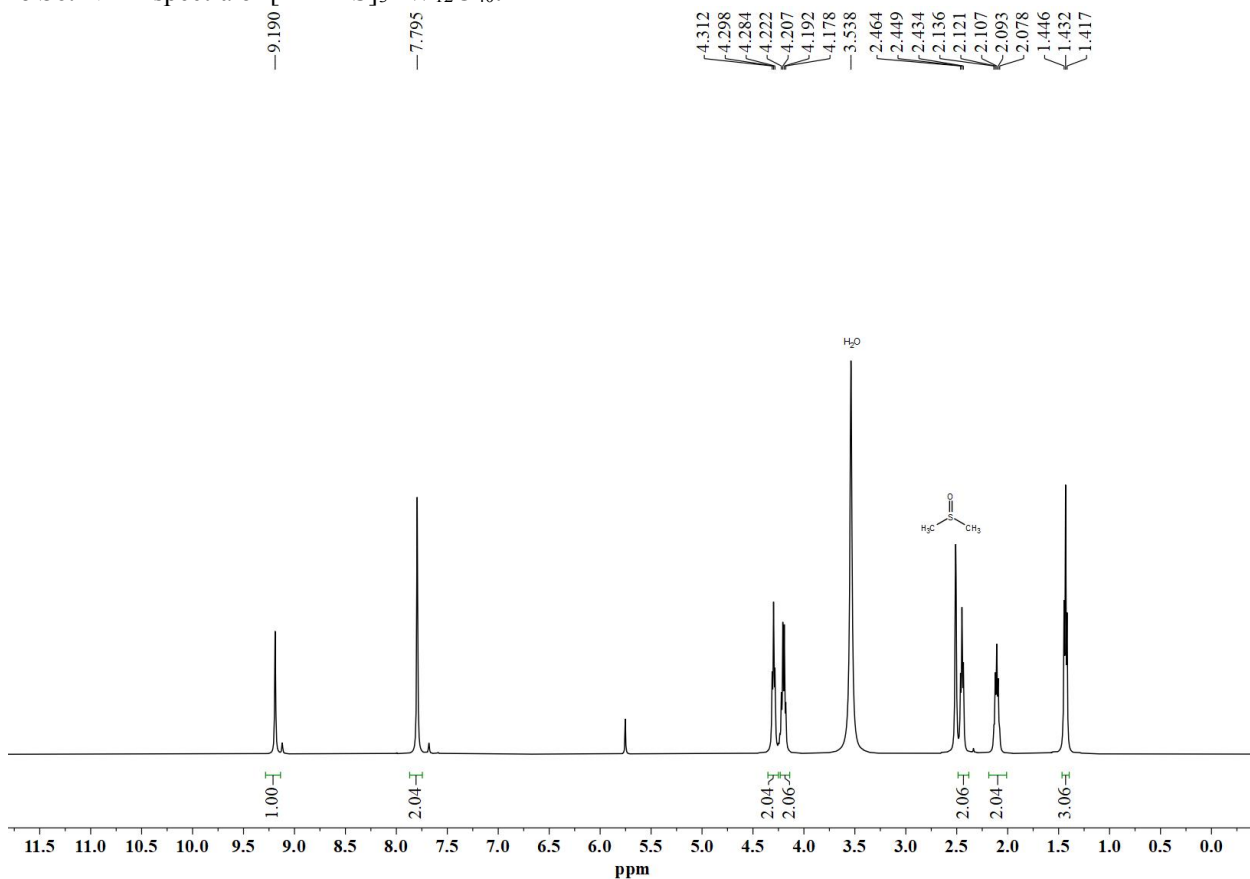

(a)  $^1\text{H}$  NMR (500 MHz,  $\text{DMSO-}d_6$ ) of  $[\text{EIMPS}]_3\text{PW}_{12}\text{O}_{40}$ .

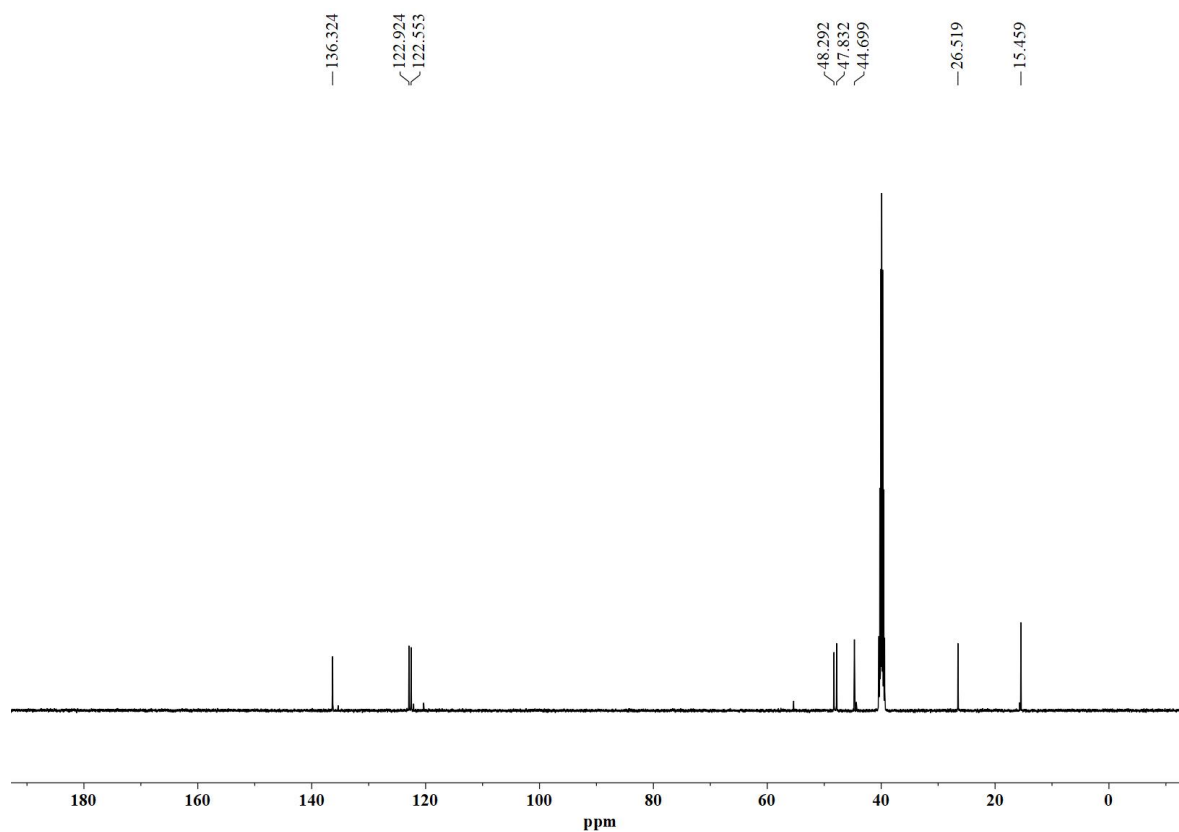

(b)  $^{13}\text{C}$  NMR (126 MHz,  $\text{DMSO-}d_6$ ) of  $[\text{EIMPS}]_3\text{PW}_{12}\text{O}_{40}$ .

Figure S7. NMR spectra of [PIMPS]<sub>3</sub>PW<sub>12</sub>O<sub>40</sub>.

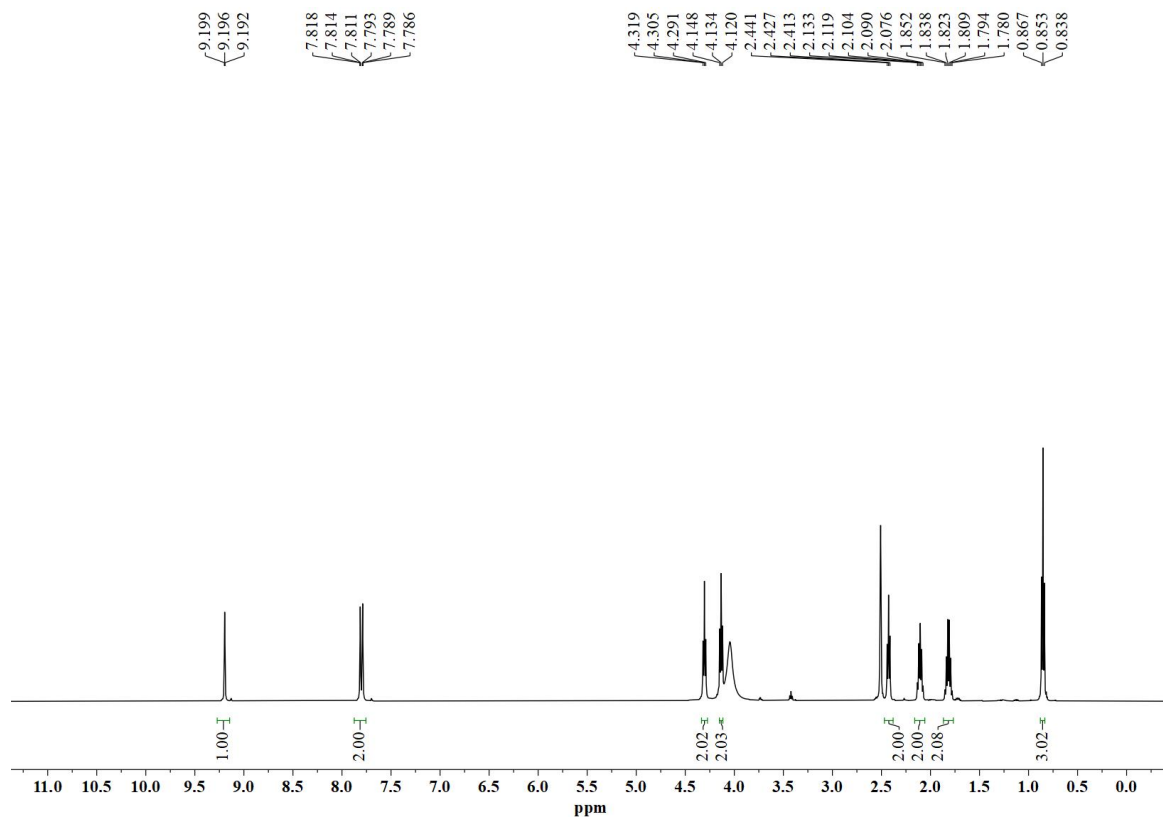

(a) <sup>1</sup>H NMR (500 MHz, DMSO-*d*<sub>6</sub>) of [PIMPS]<sub>3</sub>PW<sub>12</sub>O<sub>40</sub>.

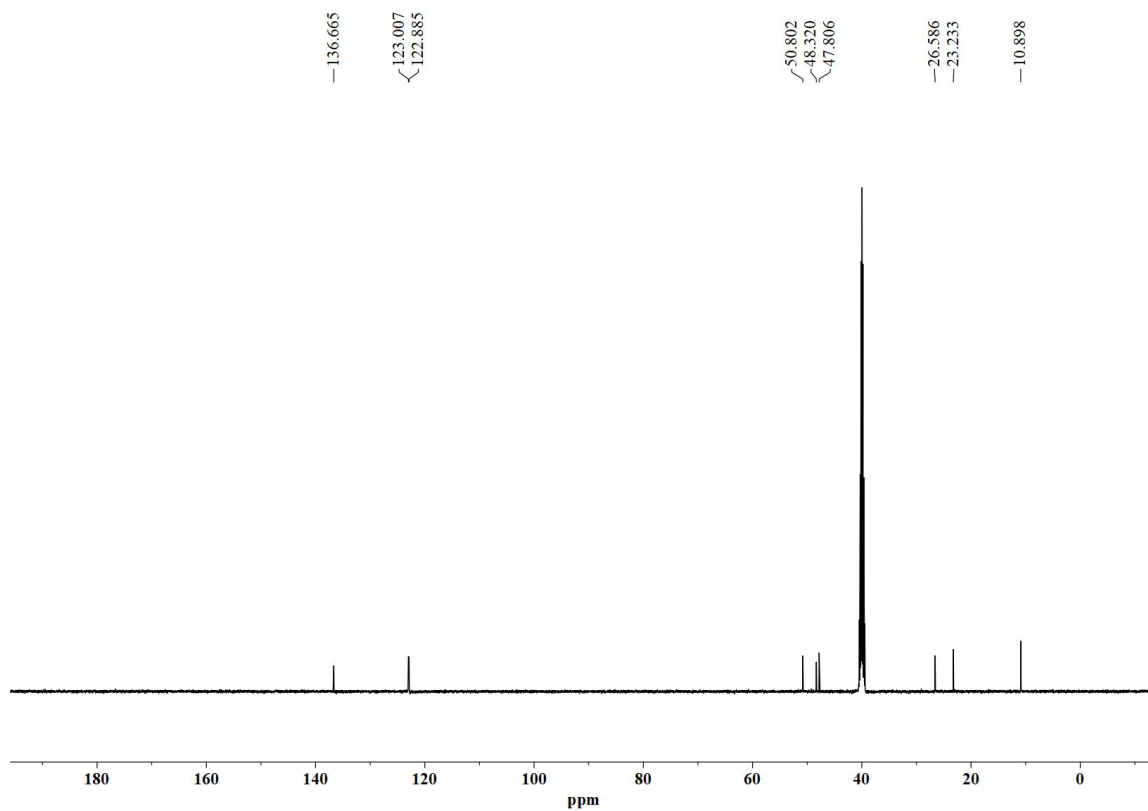

(b) <sup>13</sup>C NMR (126 MHz, DMSO-*d*<sub>6</sub>) of [PIMPS]<sub>3</sub>PW<sub>12</sub>O<sub>40</sub>.

**Figure S8.** ESI-MS of  $[\text{MIMPS}]_3\text{PW}_{12}\text{O}_{40}$ .

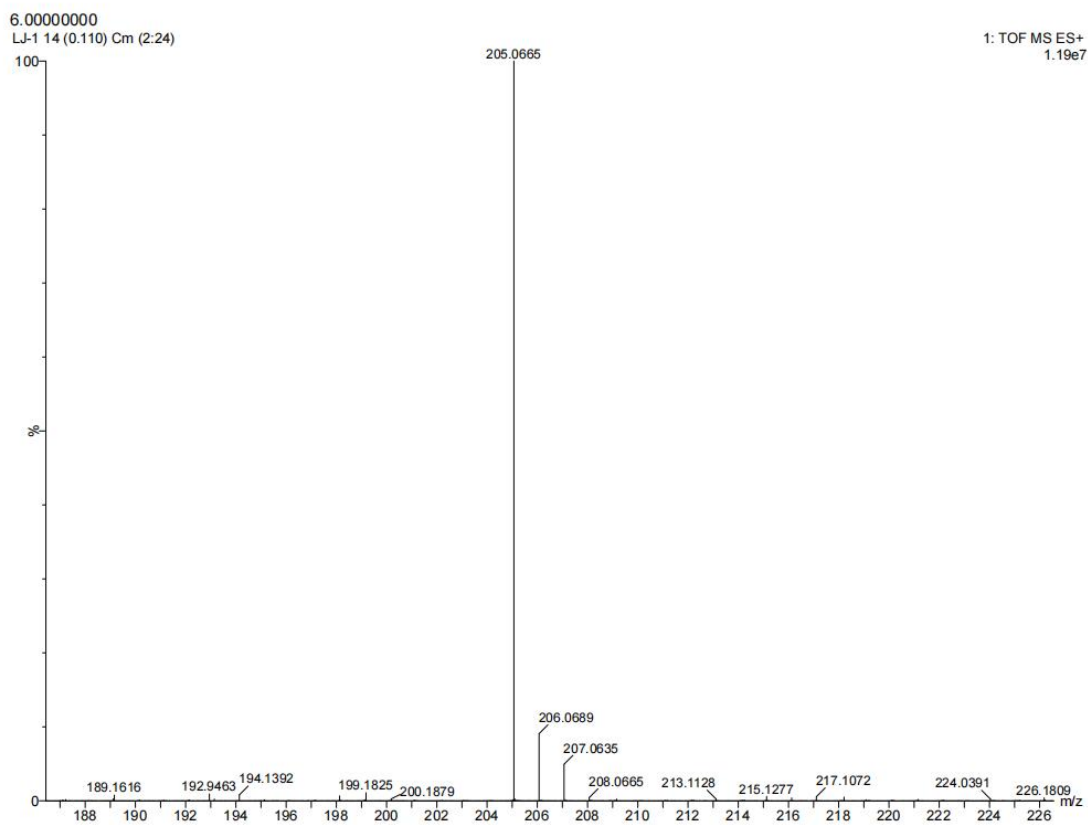

(a) Positive-ion ESI-MS of  $[\text{MIMPS}]_3\text{PW}_{12}\text{O}_{40}$ .

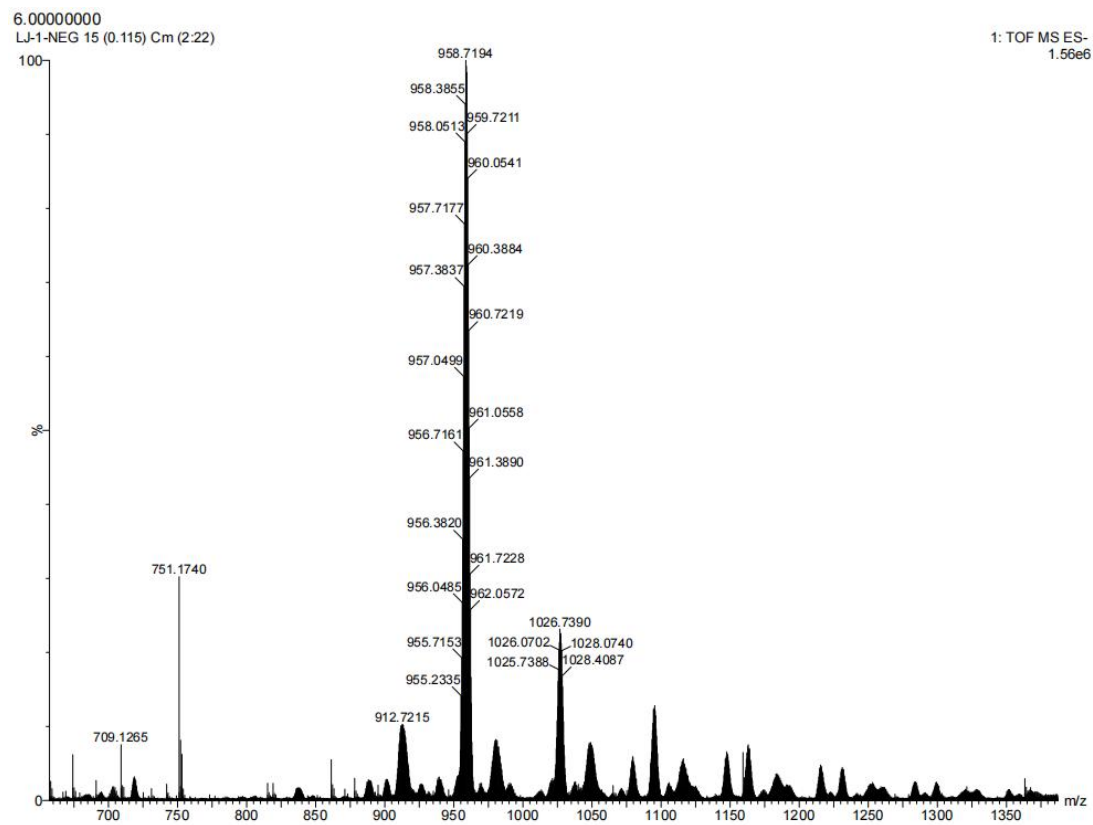

(b) Negative-ion ESI-MS of  $[\text{MIMPS}]_3\text{PW}_{12}\text{O}_{40}$ .



**Figure S9.** ESI-MS of  $[\text{EIMPS}]_3\text{PW}_{12}\text{O}_{40}$ .

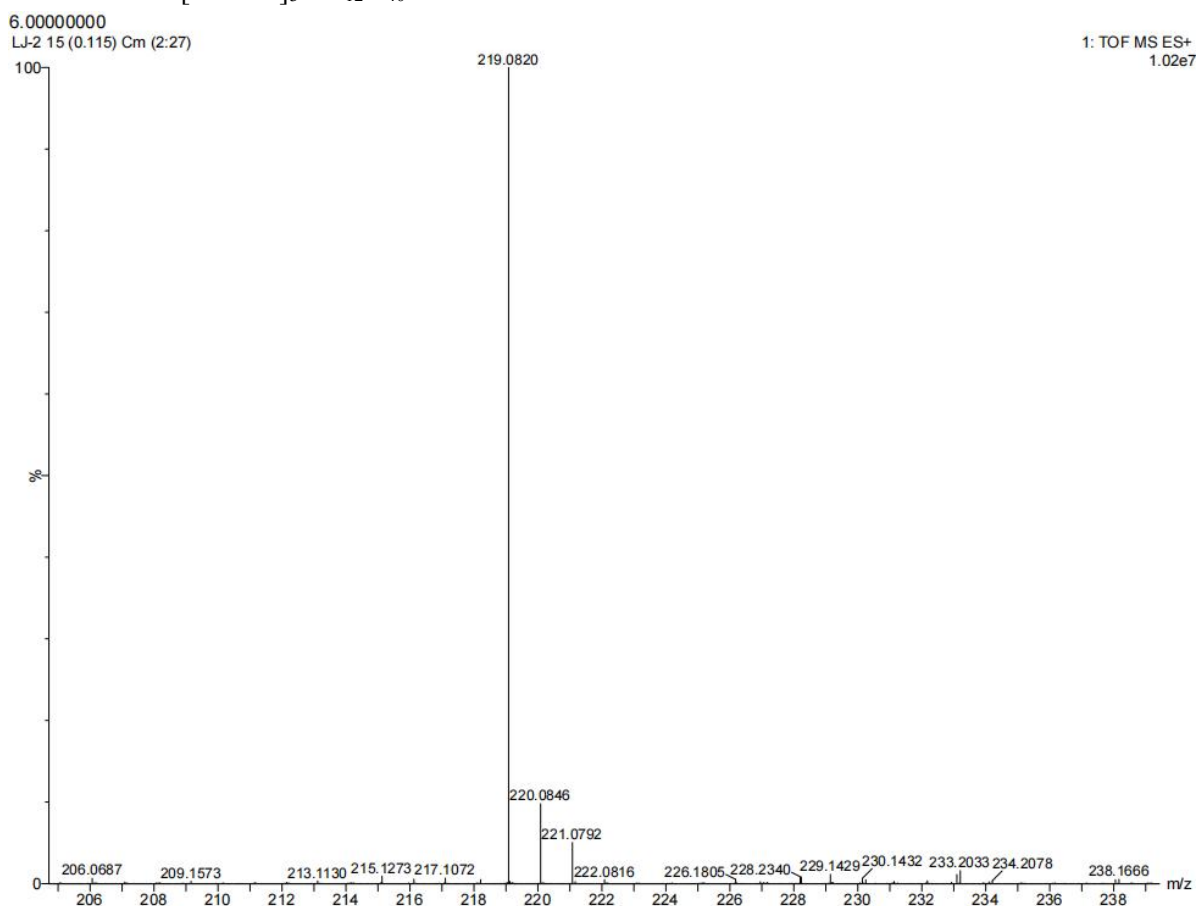

(a) Positive-ion ESI-MS of  $[\text{EIMPS}]_3\text{PW}_{12}\text{O}_{40}$ .

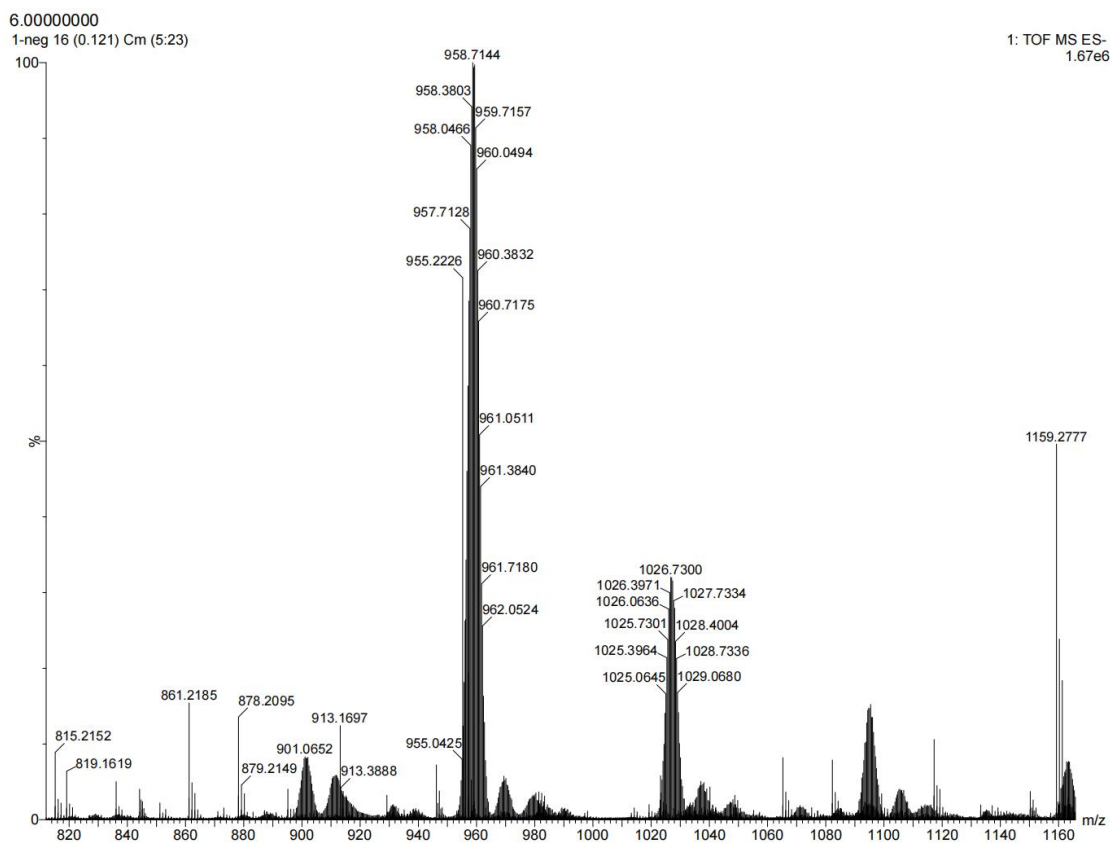

(b) Negative-ion ESI-MS of  $[\text{EIMPS}]_3\text{PW}_{12}\text{O}_{40}$ .

**Figure S10.** ESI-MS of  $[\text{PIMPS}]_3\text{PW}_{12}\text{O}_{40}$ .

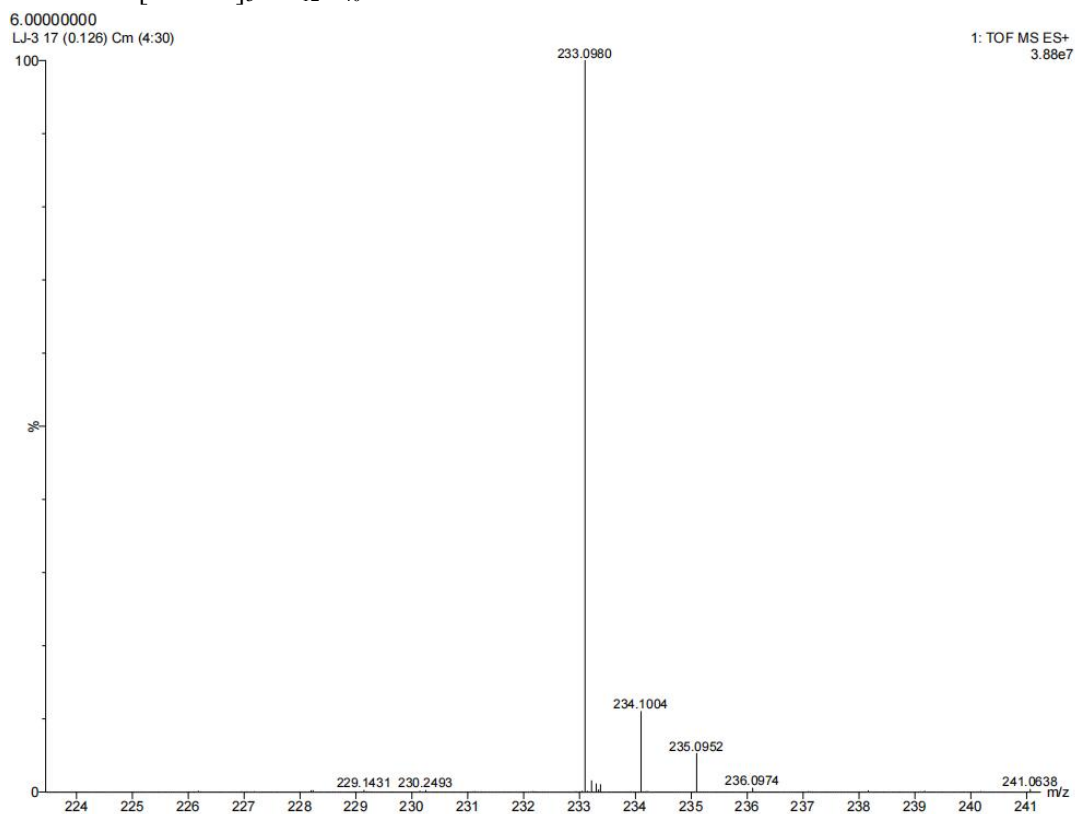

(a) Positive-ion ESI-MS of  $[\text{PIMPS}]_3\text{PW}_{12}\text{O}_{40}$ .

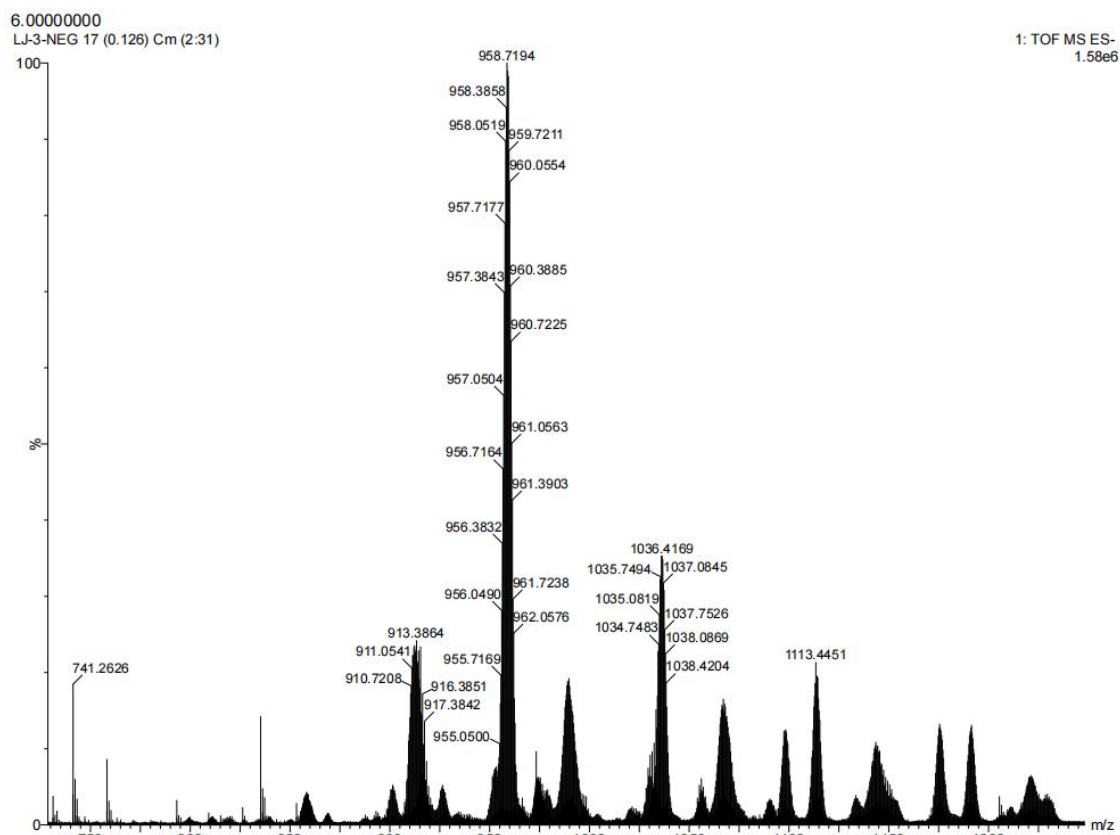

(b) Negative-ion ESI-MS of  $[\text{PIMPS}]_3\text{PW}_{12}\text{O}_{40}$ .

**Figure S11.** PXRD patterns of  $[\text{MIMPS}]_3\text{PW}_{12}\text{O}_{40}$ .

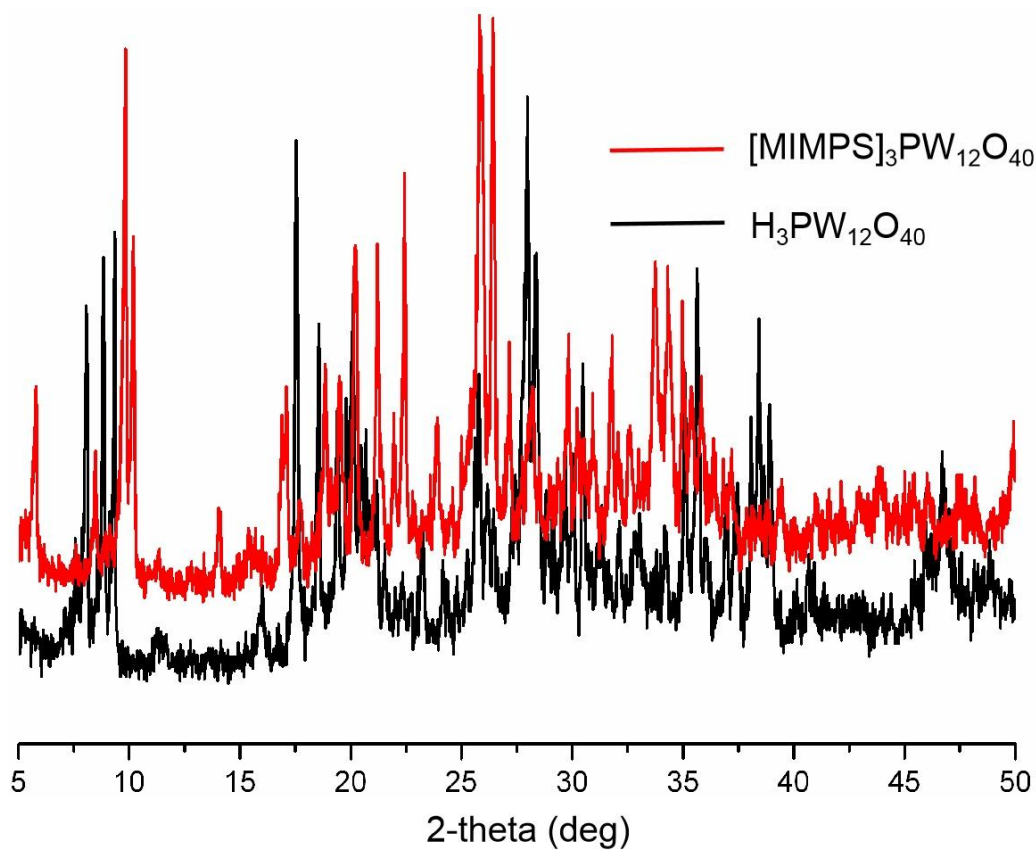

**Figure S12.** PXRD patterns of  $[\text{EIMPS}]_3\text{PW}_{12}\text{O}_{40}$ .

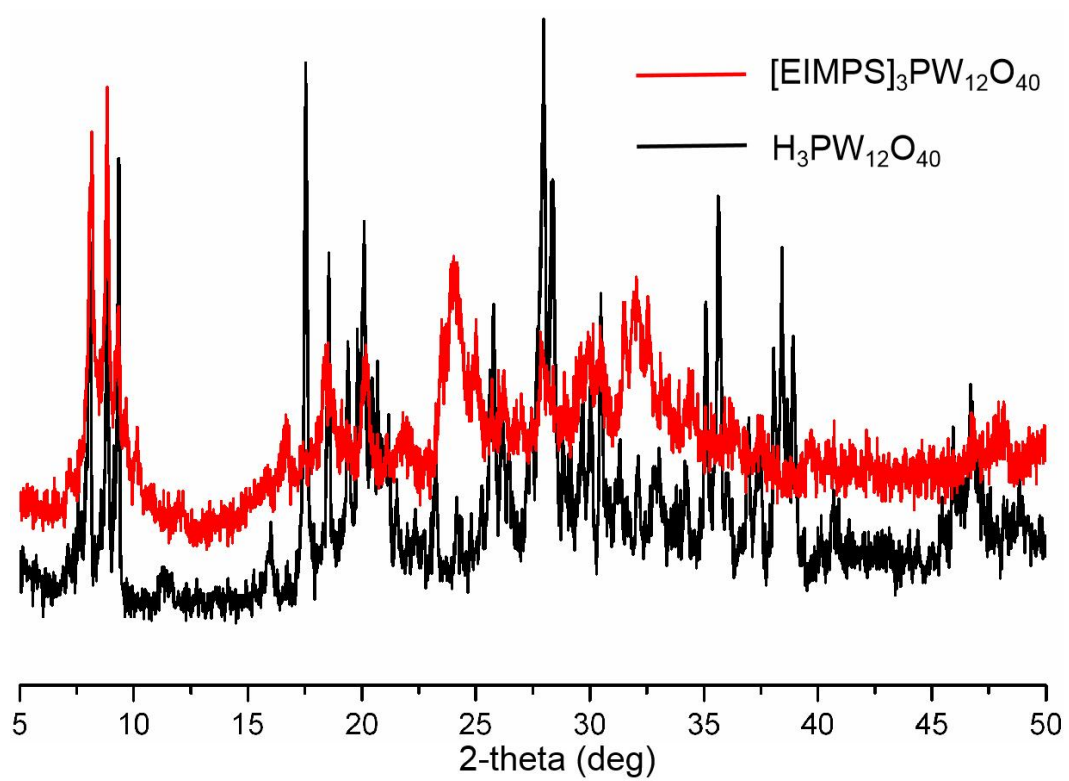

Figure S13. PXRD patterns of  $[\text{PIMPS}]_3\text{PW}_{12}\text{O}_{40}$ .

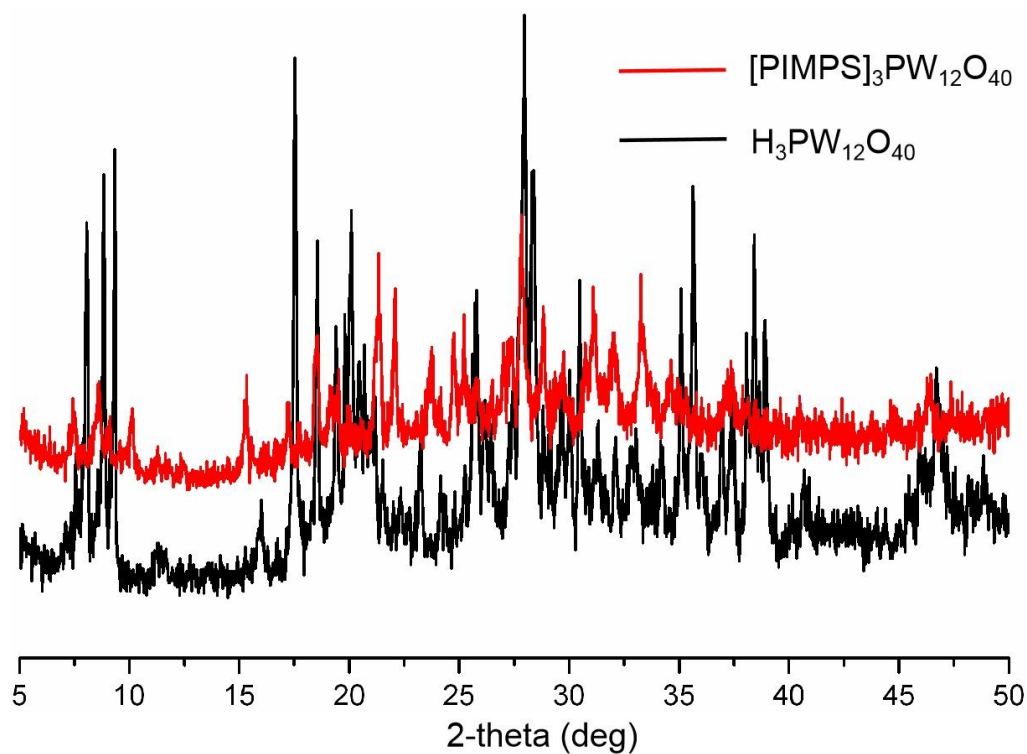

Figure S14. NMR spectra of (4-fluorophenyl)(2-phenylpropan-2-yl)sulfane.

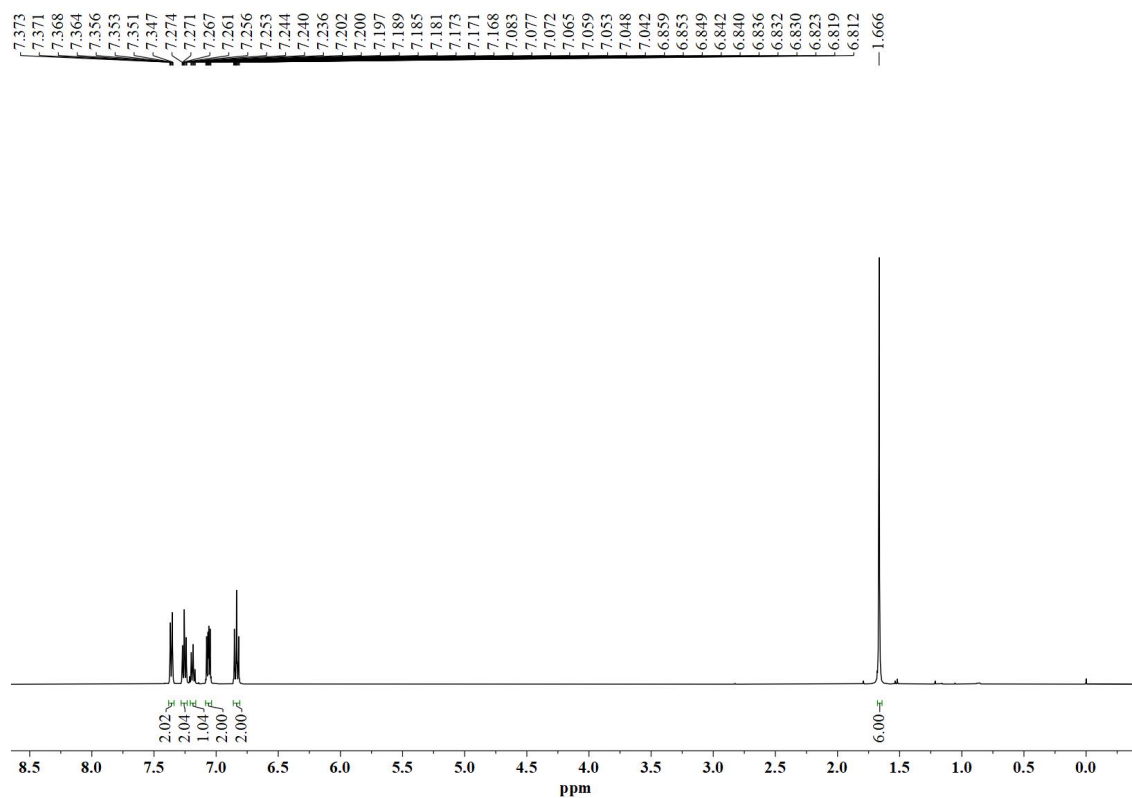

(a)  $^1\text{H}$  NMR spectrum of (4-fluorophenyl)(2-phenylpropan-2-yl)sulfane in  $\text{CDCl}_3$ .

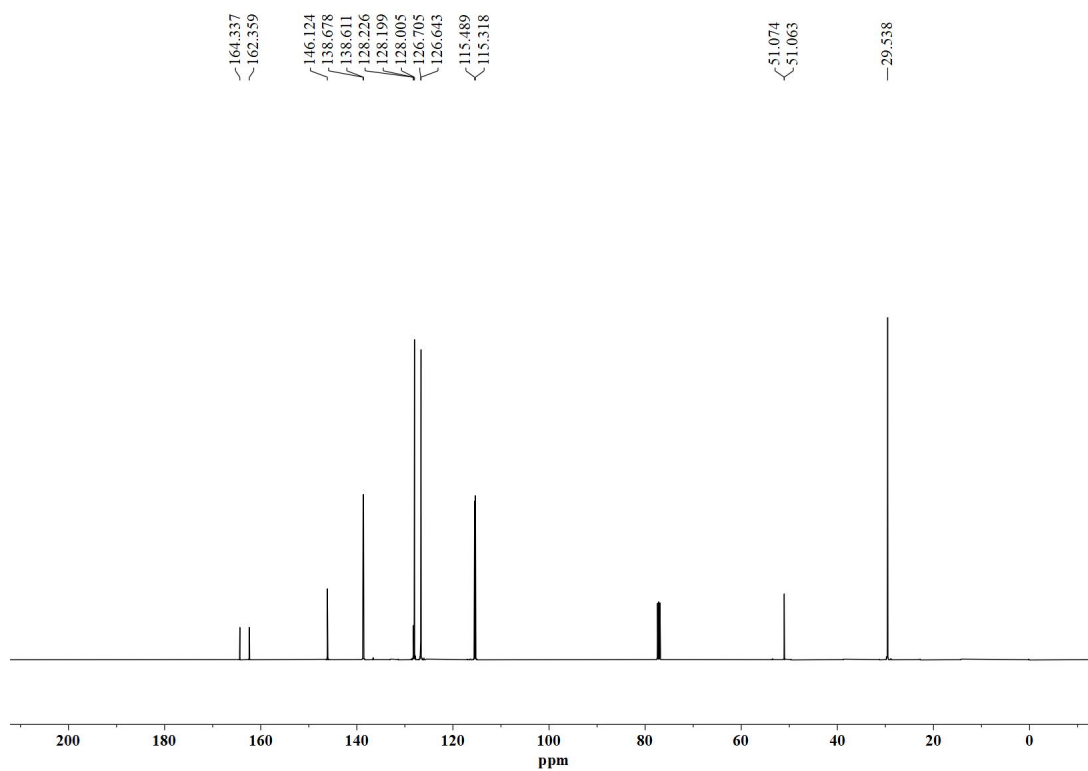

(b)  $^{13}\text{C}$  NMR spectrum of (4-fluorophenyl)(2-phenylpropan-2-yl)sulfane in  $\text{CDCl}_3$ .

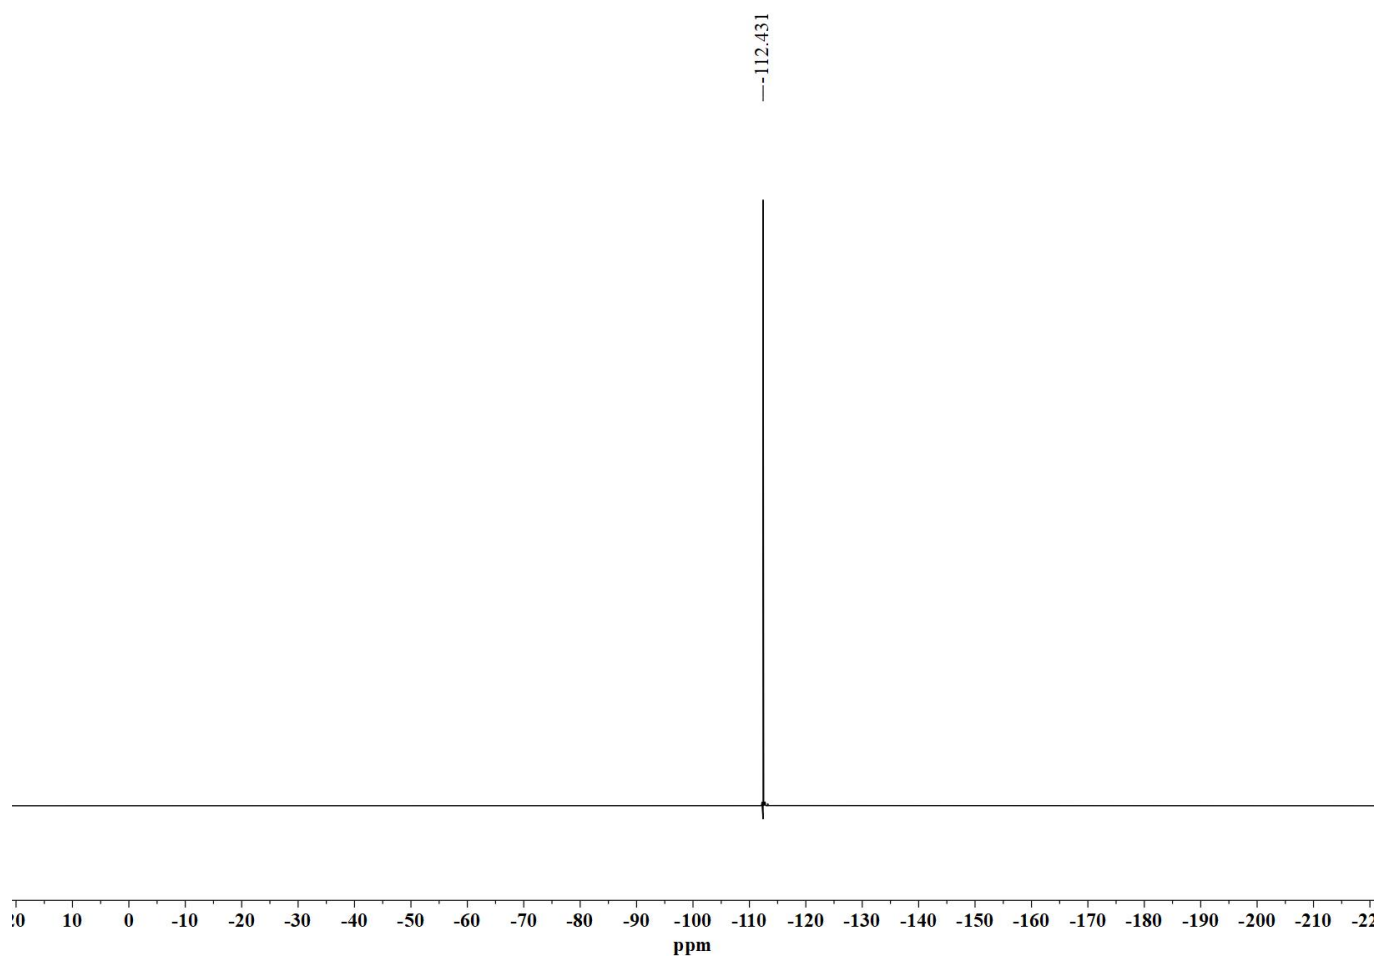

(c)  $^{19}\text{F}$  NMR spectrum of (4-fluorophenyl)(2-phenylpropan-2-yl)sulfane in  $\text{CDCl}_3$ .

**Figure S15.** NMR spectra of (4-bromophenyl)(2-phenylpropan-2-yl)sulfane.

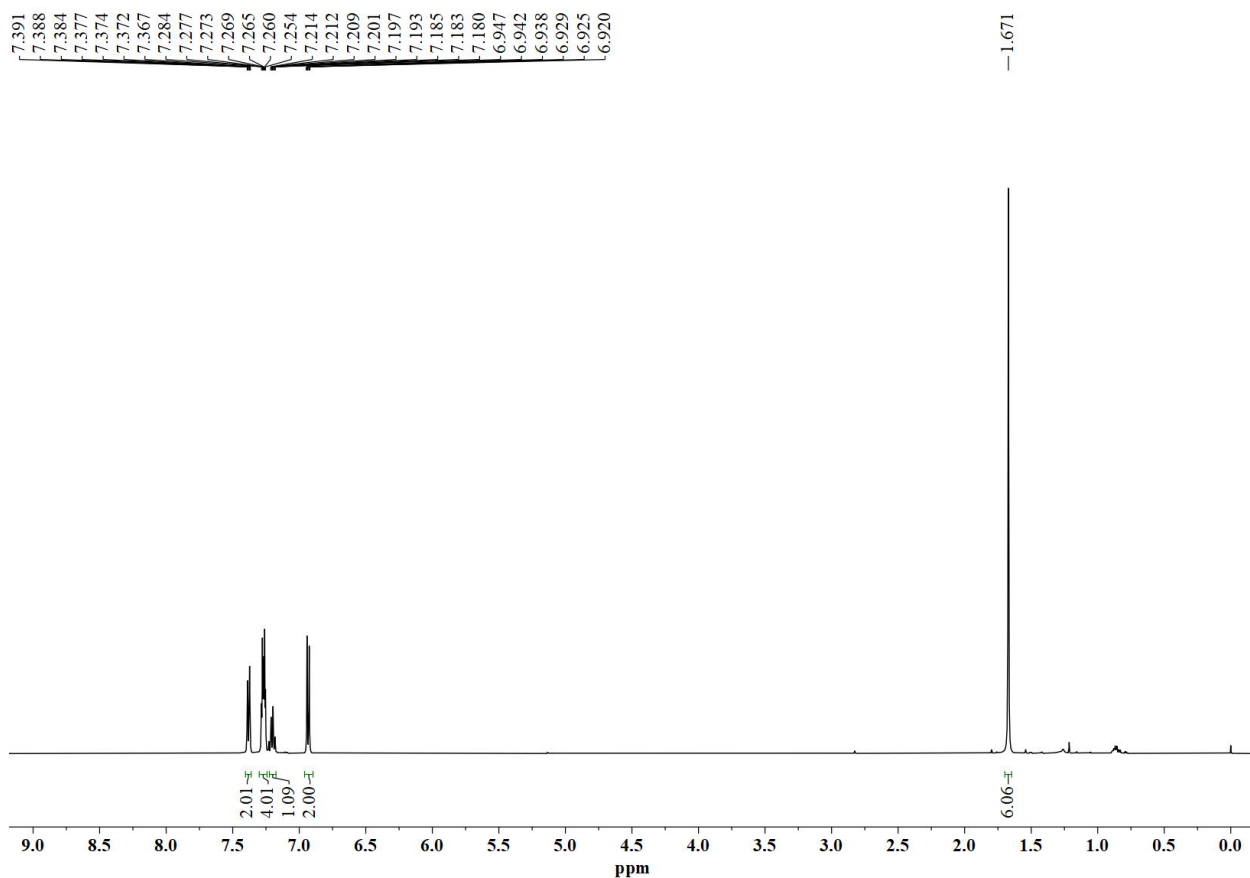

(a)  $^1\text{H}$  NMR spectrum of (4-bromophenyl)(2-phenylpropan-2-yl)sulfane in  $\text{CDCl}_3$ .

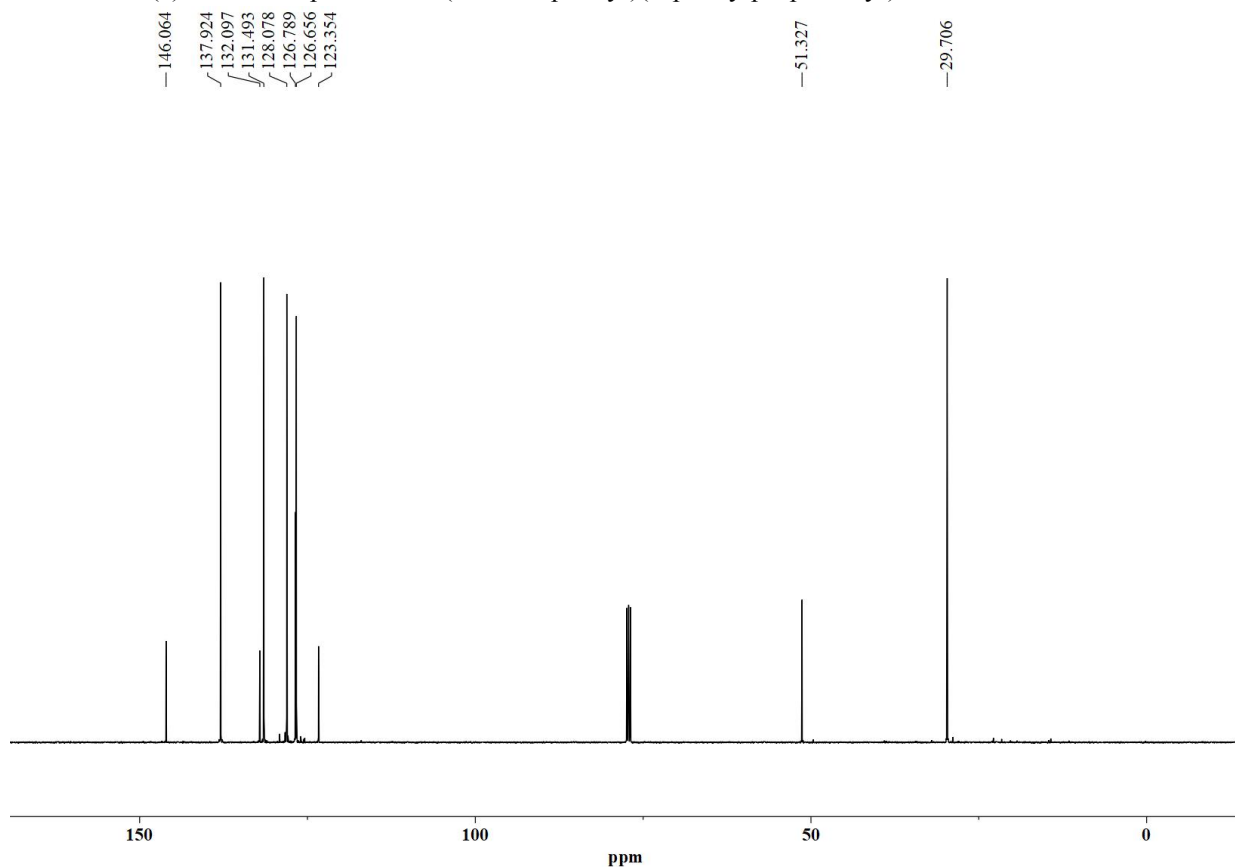

(b)  $^{13}\text{C}$  NMR spectrum of (4-bromophenyl)(2-phenylpropan-2-yl)sulfane in  $\text{CDCl}_3$ .

**Figure S16.** NMR spectra of (4-chlorophenyl)(2-phenylpropan-2-yl)sulfane.

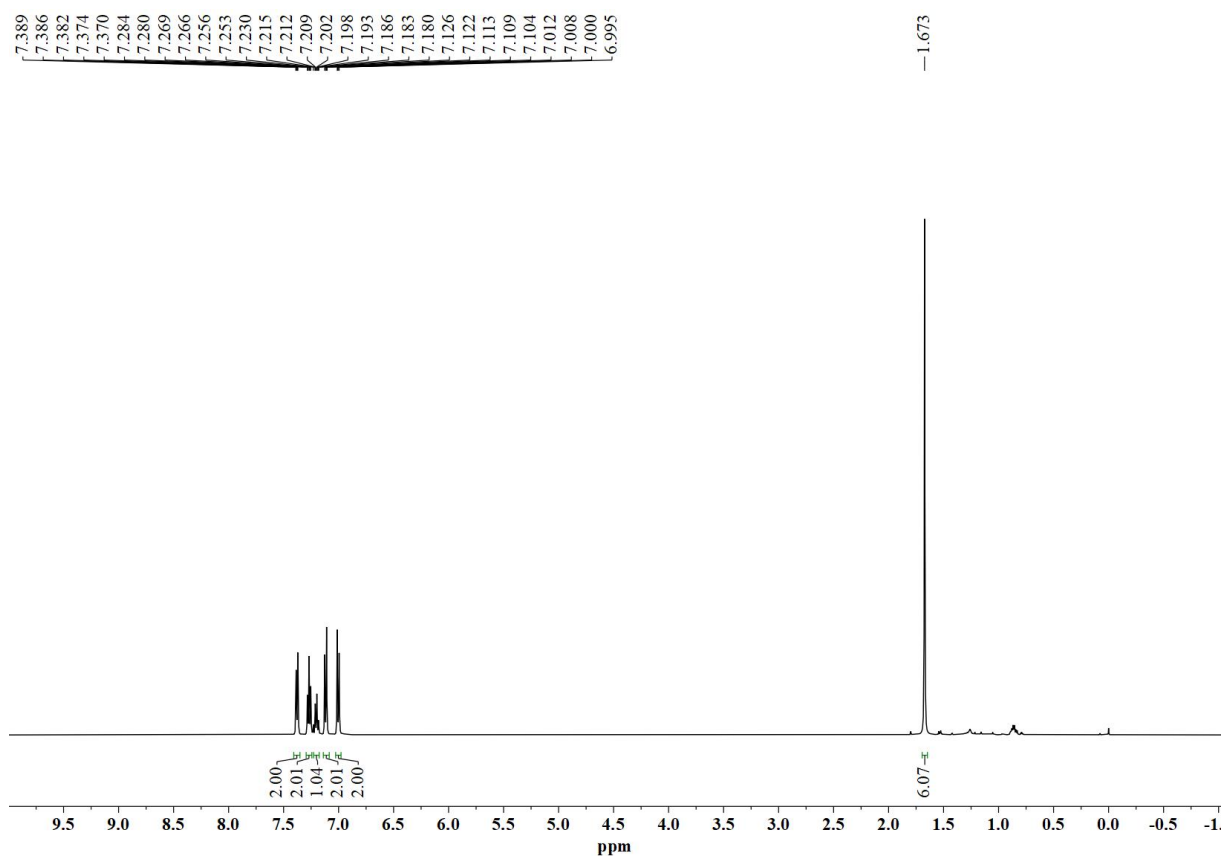

(a)  $^1\text{H}$  NMR spectrum of (4-chlorophenyl)(2-phenylpropan-2-yl)sulfane in  $\text{CDCl}_3$ .

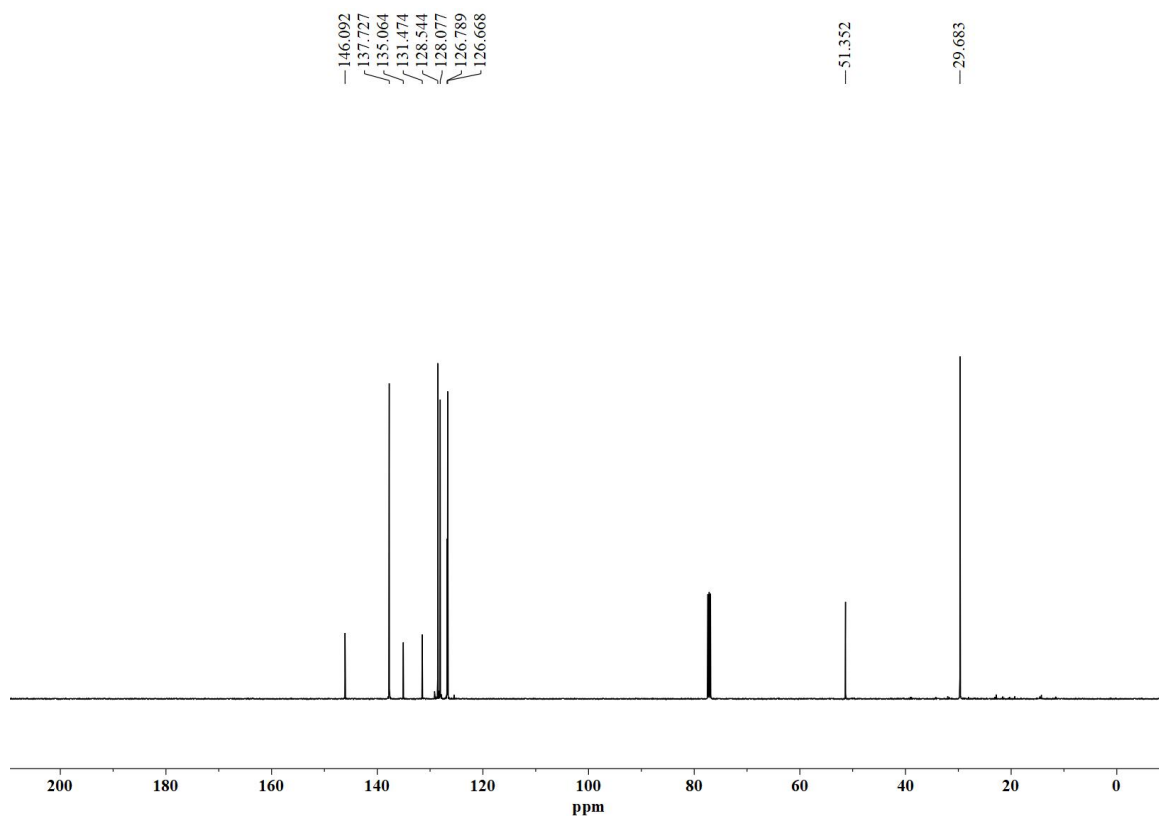

(b)  $^{13}\text{C}$  NMR spectrum of (4-chlorophenyl)(2-phenylpropan-2-yl)sulfane in  $\text{CDCl}_3$ .

Figure S17. NMR spectra of (3-chlorophenyl)(2-phenylpropan-2-yl)sulfane.

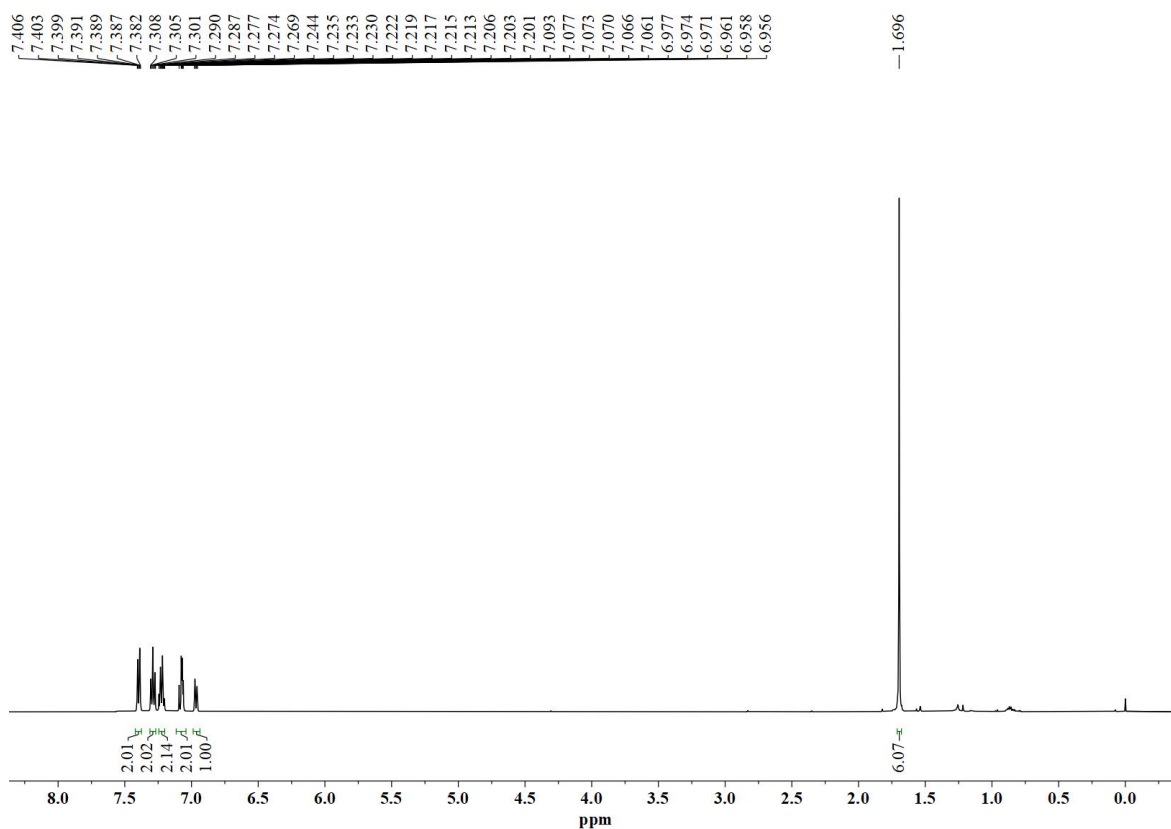

(a)  $^1\text{H}$  NMR spectrum of (3-chlorophenyl)(2-phenylpropan-2-yl)sulfane in  $\text{CDCl}_3$ .

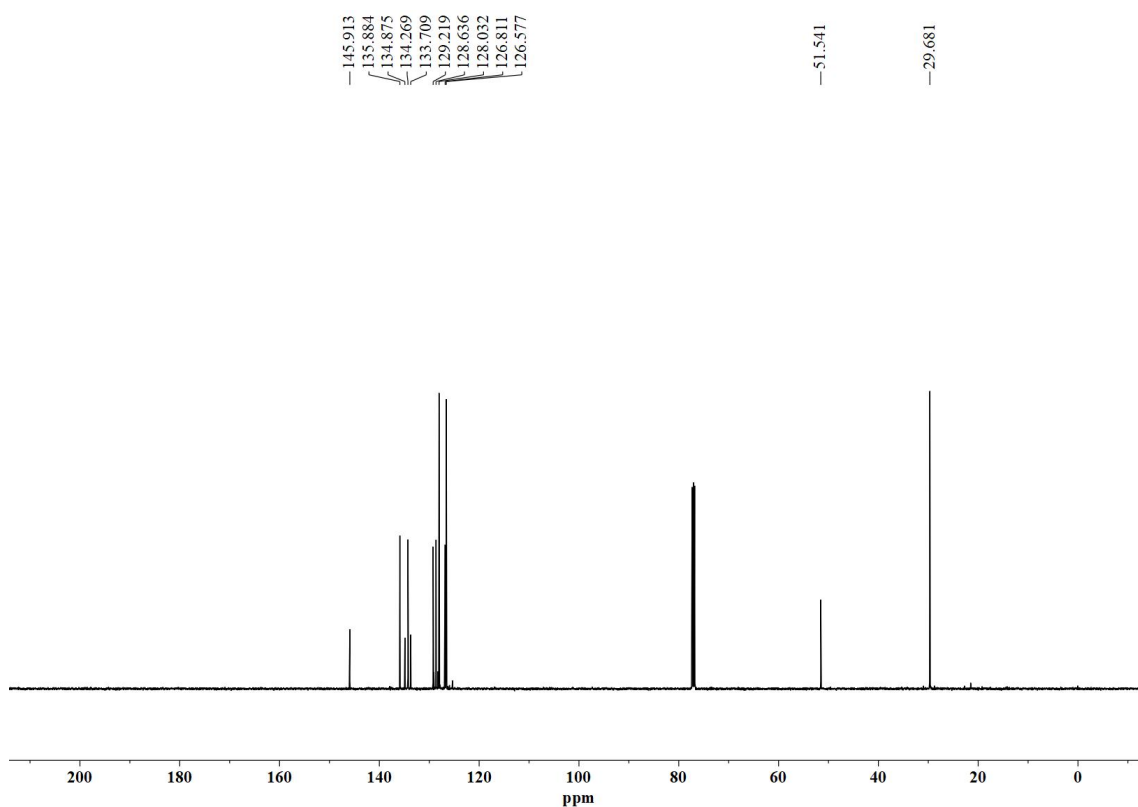

(b)  $^{13}\text{C}$  NMR spectrum of (3-chlorophenyl)(2-phenylpropan-2-yl)sulfane in  $\text{CDCl}_3$ .



**Figure S18.** NMR spectra of (2-chlorophenyl)(2-phenylpropan-2-yl)sulfane.

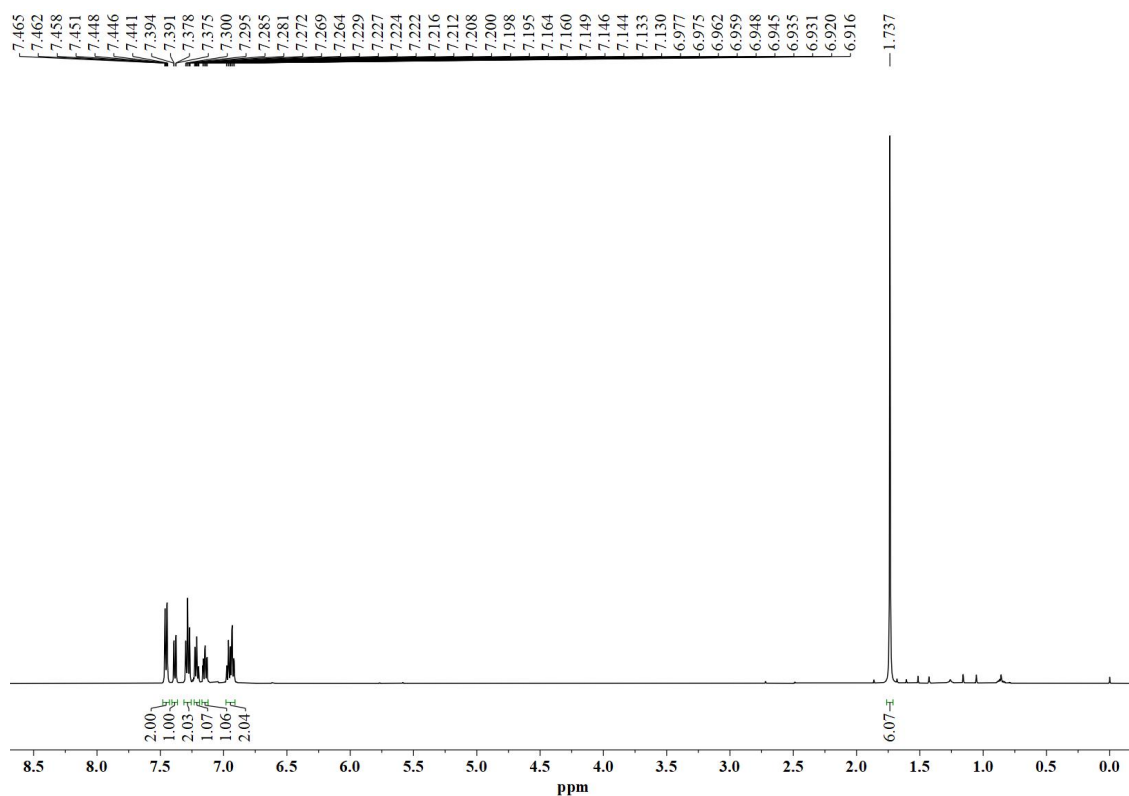

(a)  $^1\text{H}$  NMR spectrum of (2-chlorophenyl)(2-phenylpropan-2-yl)sulfane in  $\text{CDCl}_3$ .

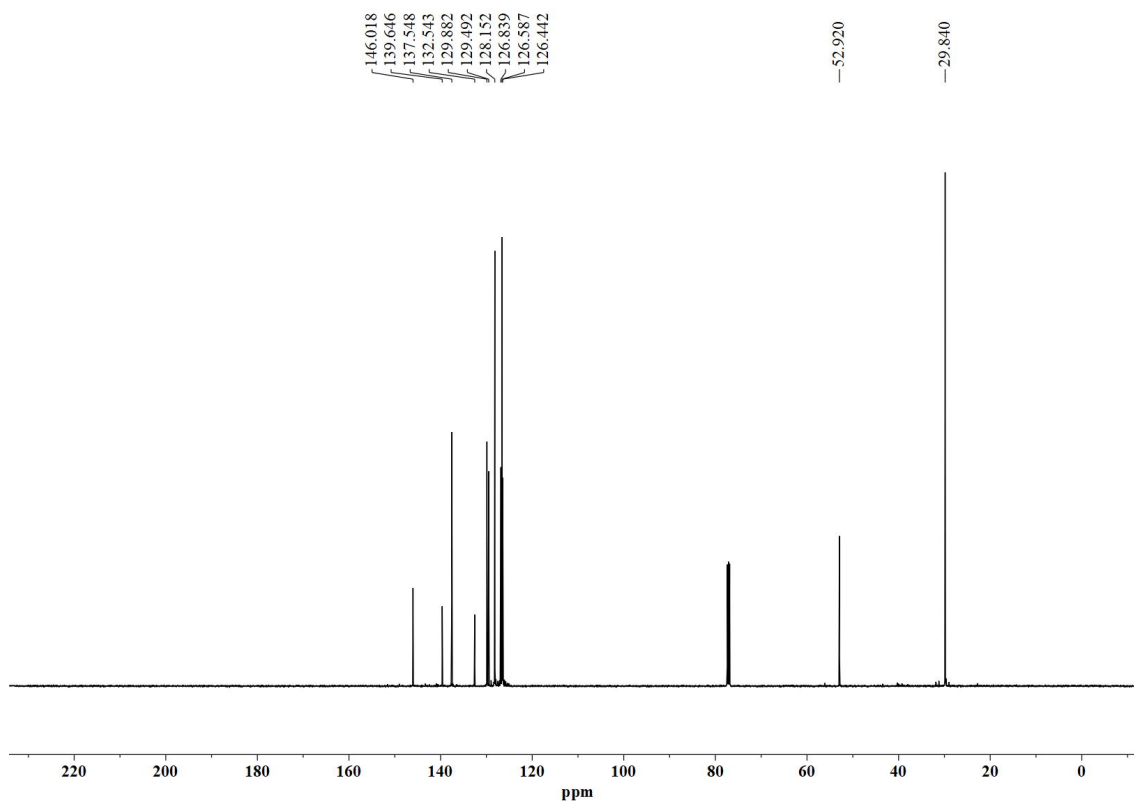

(b)  $^{13}\text{C}$  NMR spectrum of (2-chlorophenyl)(2-phenylpropan-2-yl)sulfane in  $\text{CDCl}_3$ .

**Figure S19.** NMR spectra of (2-phenylpropan-2-yl)(p-tolyl)sulfane.

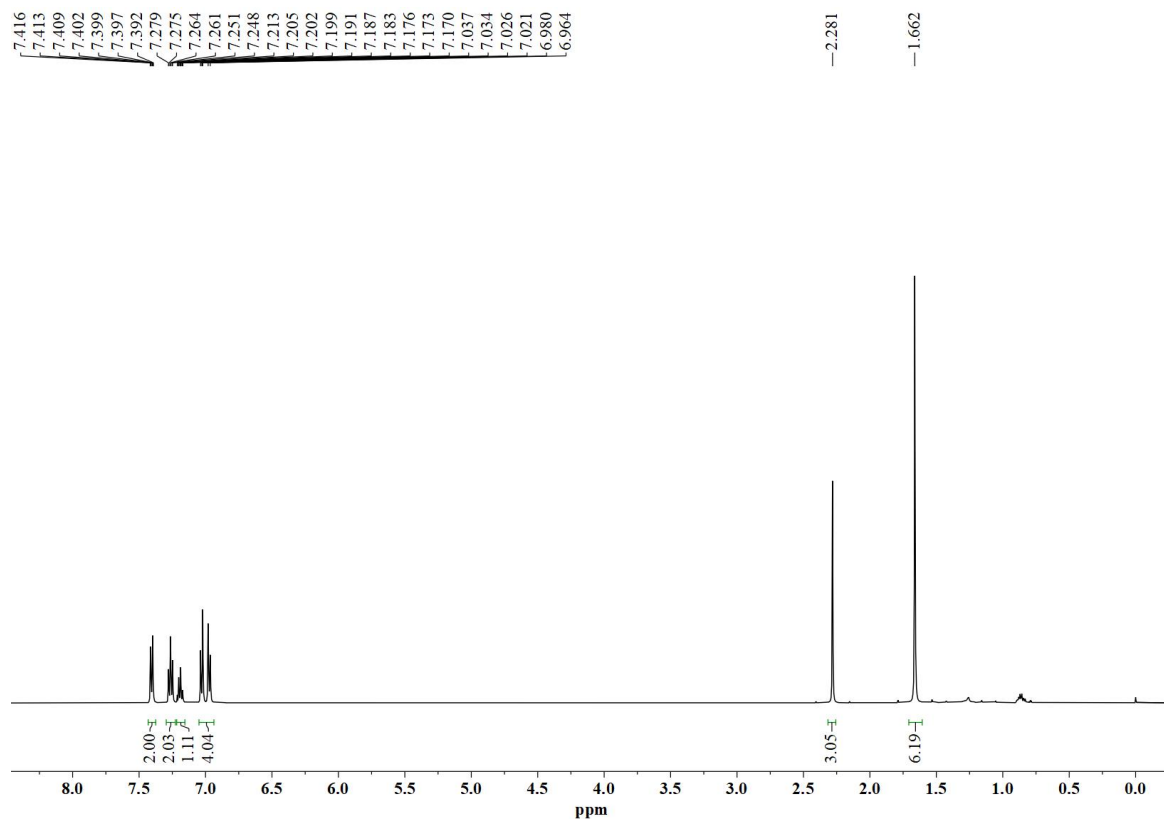

(a)  $^1\text{H}$  NMR spectrum of (2-phenylpropan-2-yl)(p-tolyl)sulfane in  $\text{CDCl}_3$ .

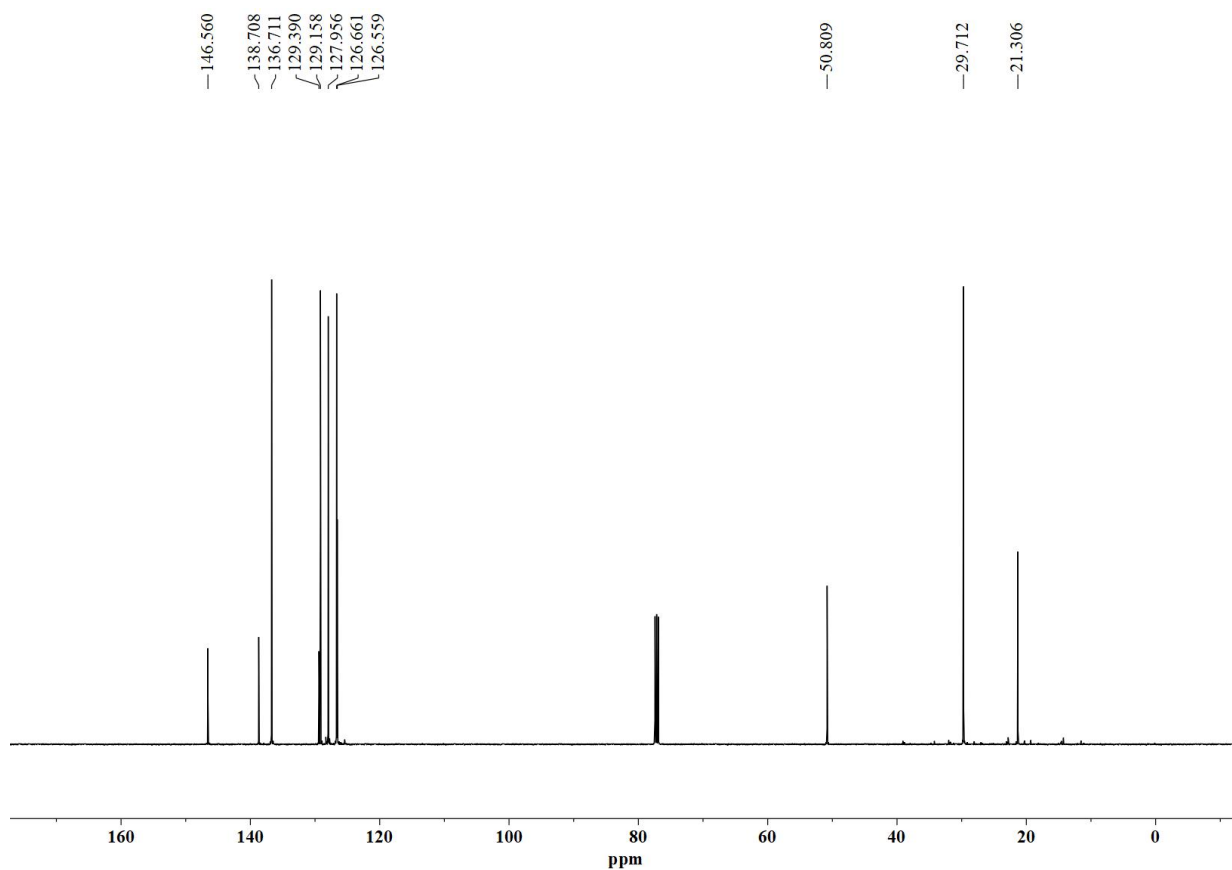

(b)  $^{13}\text{C}$  NMR spectrum of (2-phenylpropan-2-yl)(p-tolyl)sulfane in  $\text{CDCl}_3$ .

**Figure S20.** NMR spectra of (4-methoxyphenyl)(2-phenylpropan-2-yl)sulfane.

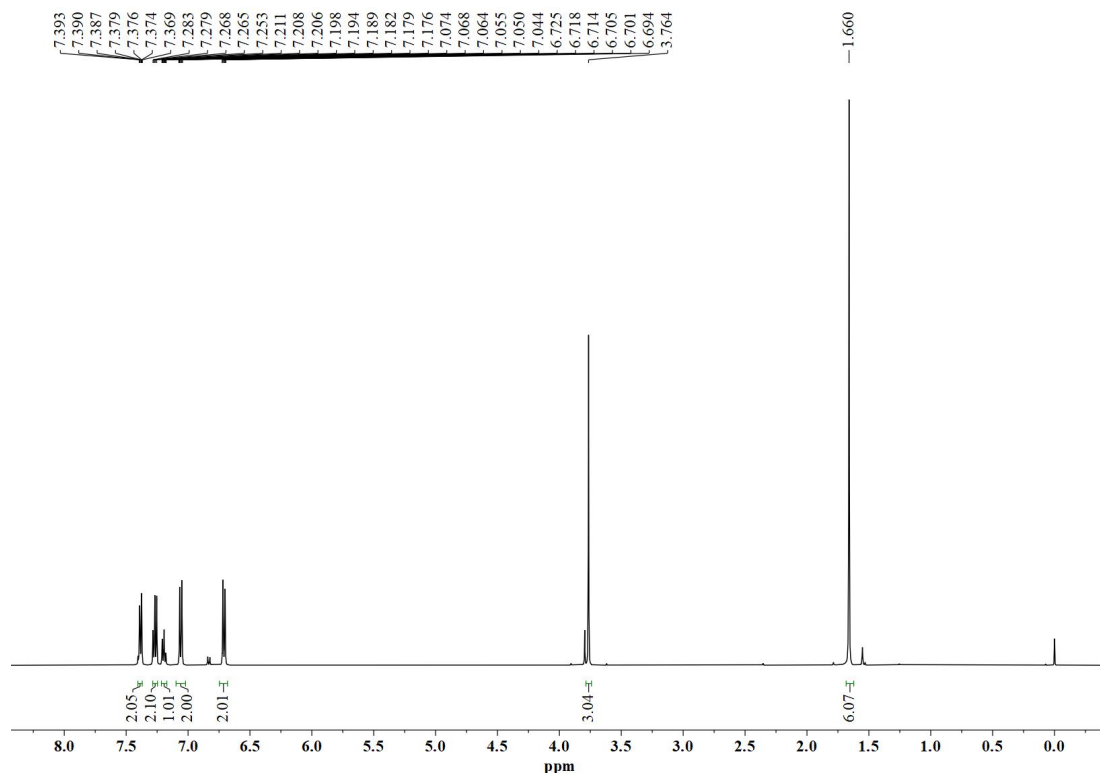

(a)  $^1\text{H}$  NMR spectrum of (4-methoxyphenyl)(2-phenylpropan-2-yl)sulfane in  $\text{CDCl}_3$ .

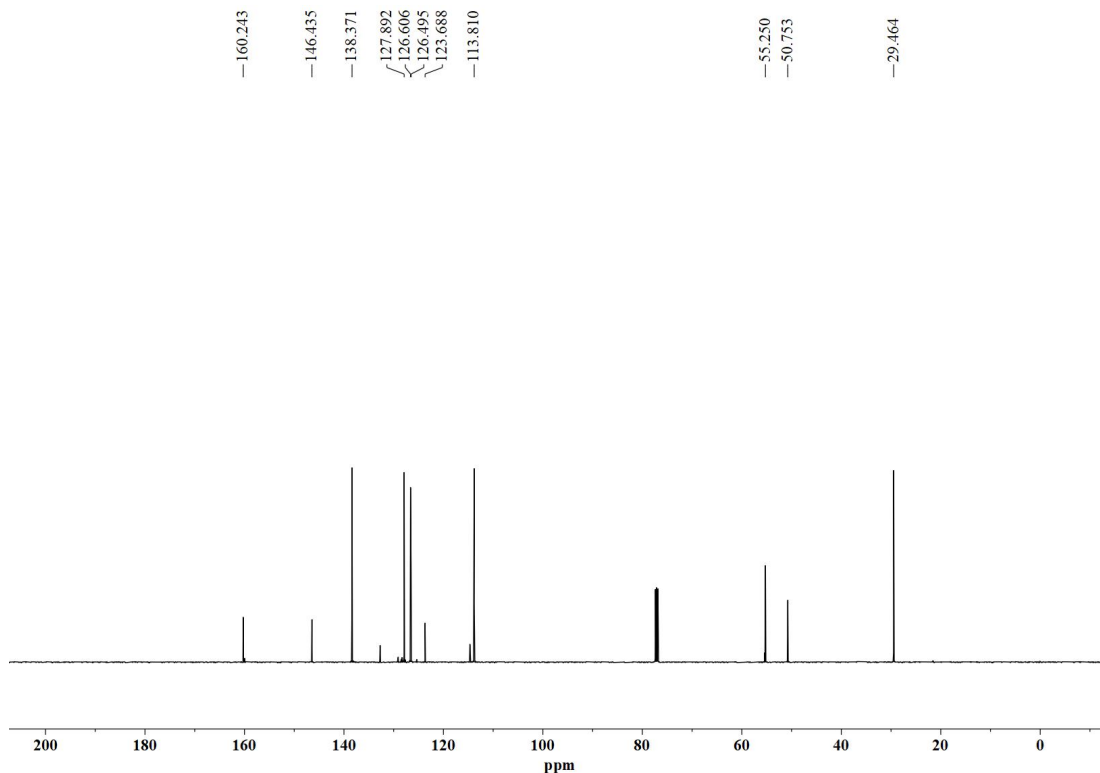

(b)  $^{13}\text{C}$  NMR spectrum of (4-methoxyphenyl)(2-phenylpropan-2-yl)sulfane in  $\text{CDCl}_3$ .

Figure S21. NMR spectra of cyclopentyl(2-phenylpropan-2-yl)sulfane.

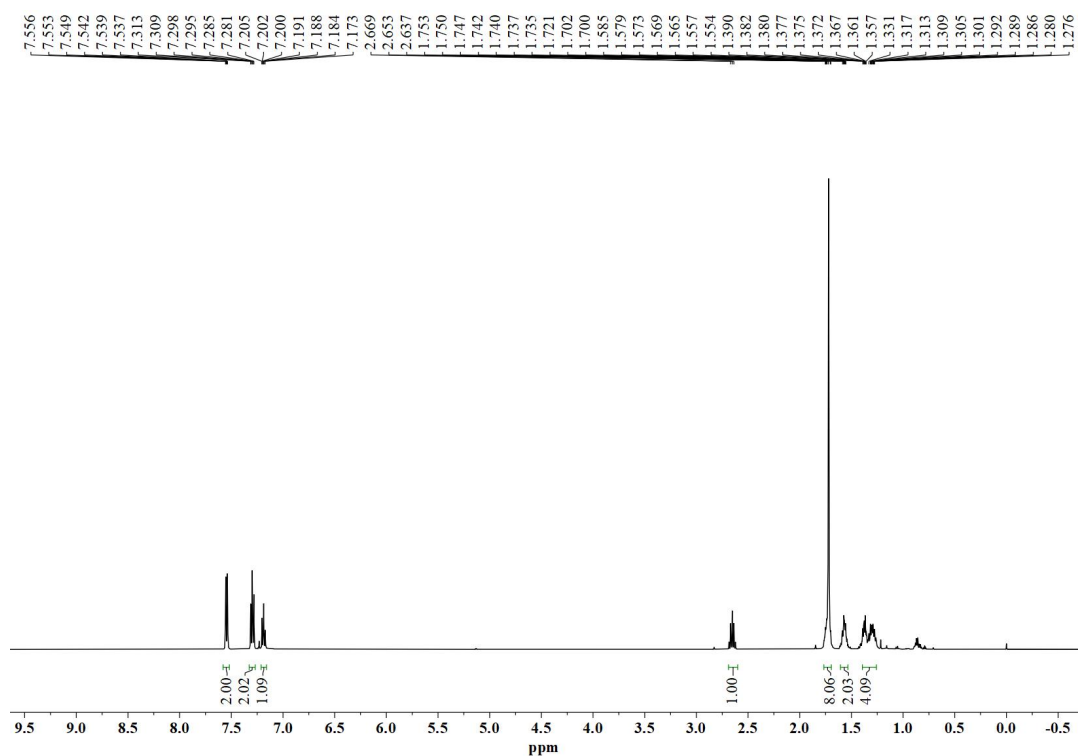

(a)  $^1\text{H}$  NMR spectrum of cyclopentyl(2-phenylpropan-2-yl)sulfane in  $\text{CDCl}_3$ .

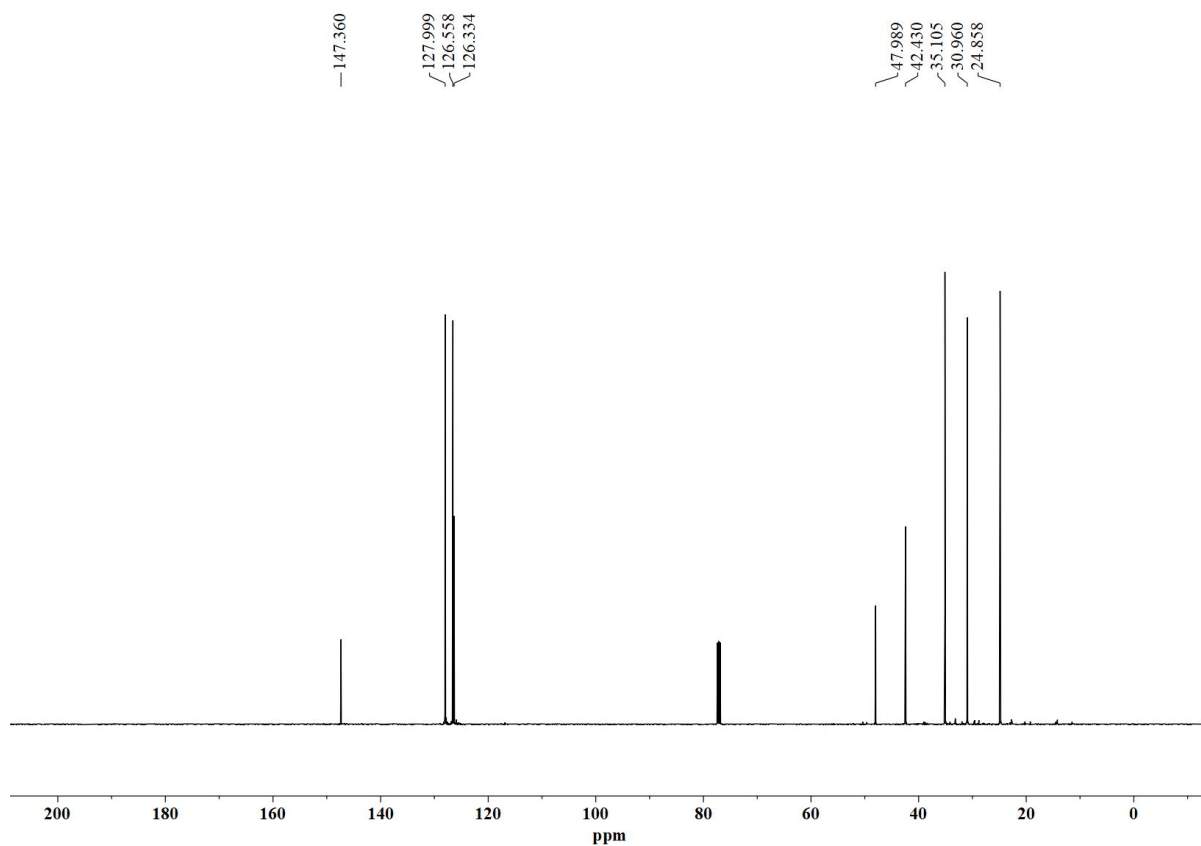

(b)  $^{13}\text{C}$  NMR spectrum of cyclopentyl(2-phenylpropan-2-yl)sulfane in  $\text{CDCl}_3$ .

Figure S22. NMR spectra of cyclohexyl(2-phenylpropan-2-yl)sulfane.

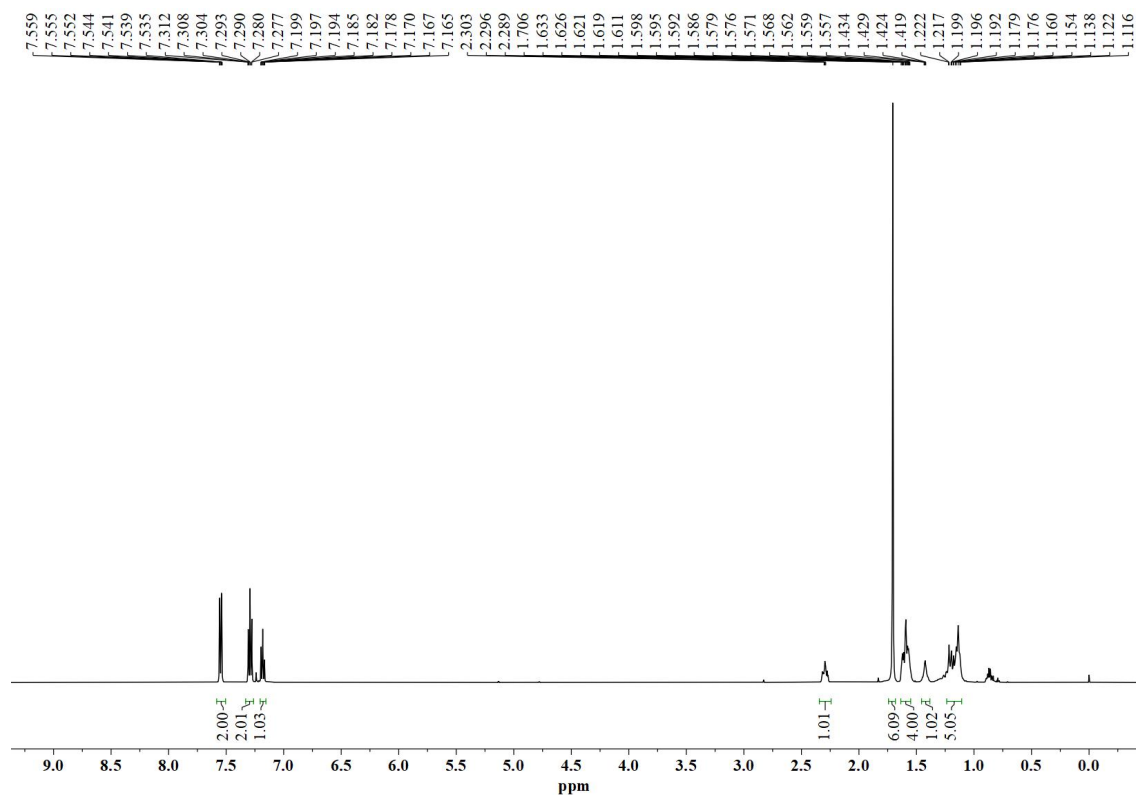

(a)  $^1\text{H}$  NMR spectrum of cyclohexyl(2-phenylpropan-2-yl)sulfane in  $\text{CDCl}_3$ .

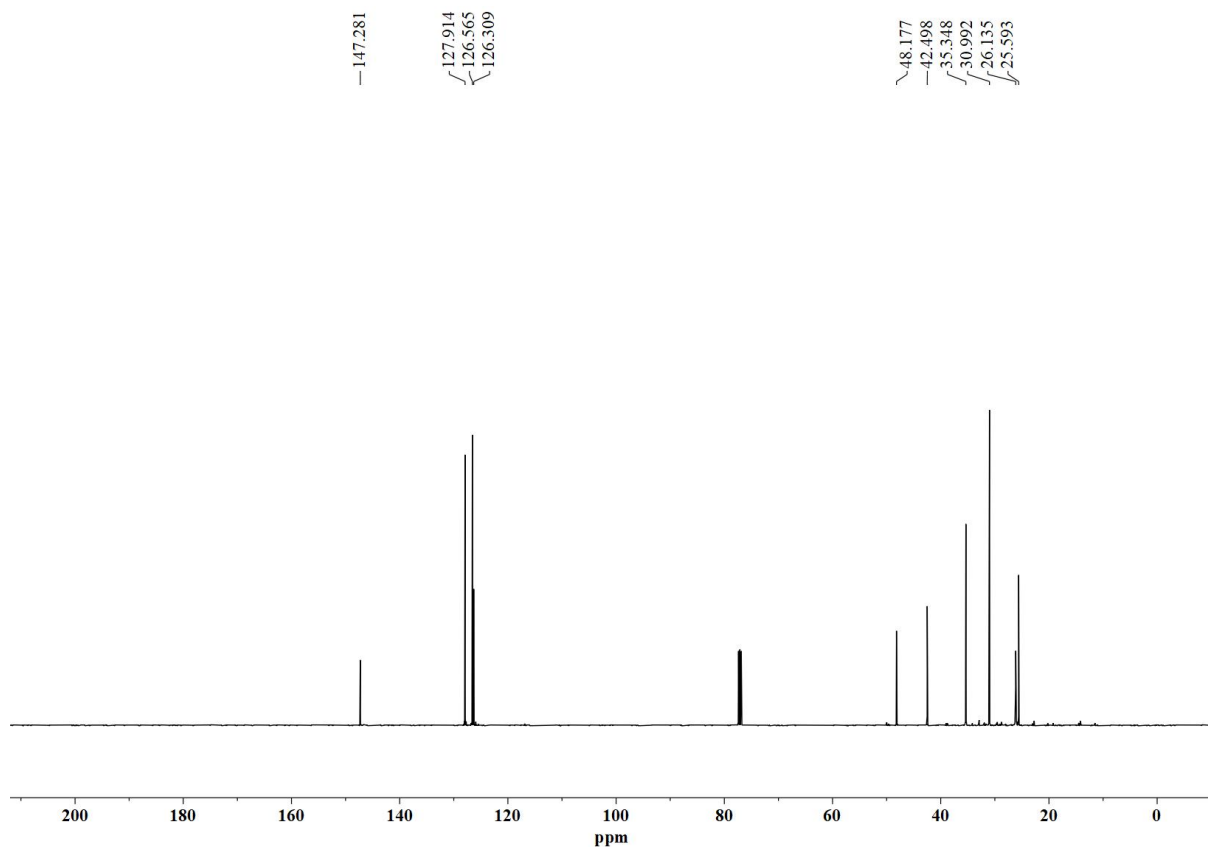

(b)  $^{13}\text{C}$  NMR spectrum of cyclohexyl(2-phenylpropan-2-yl)sulfane in  $\text{CDCl}_3$ .

**Figure S23.** NMR spectra of (4-fluorophenyl)(1-phenylethyl)sulfane.

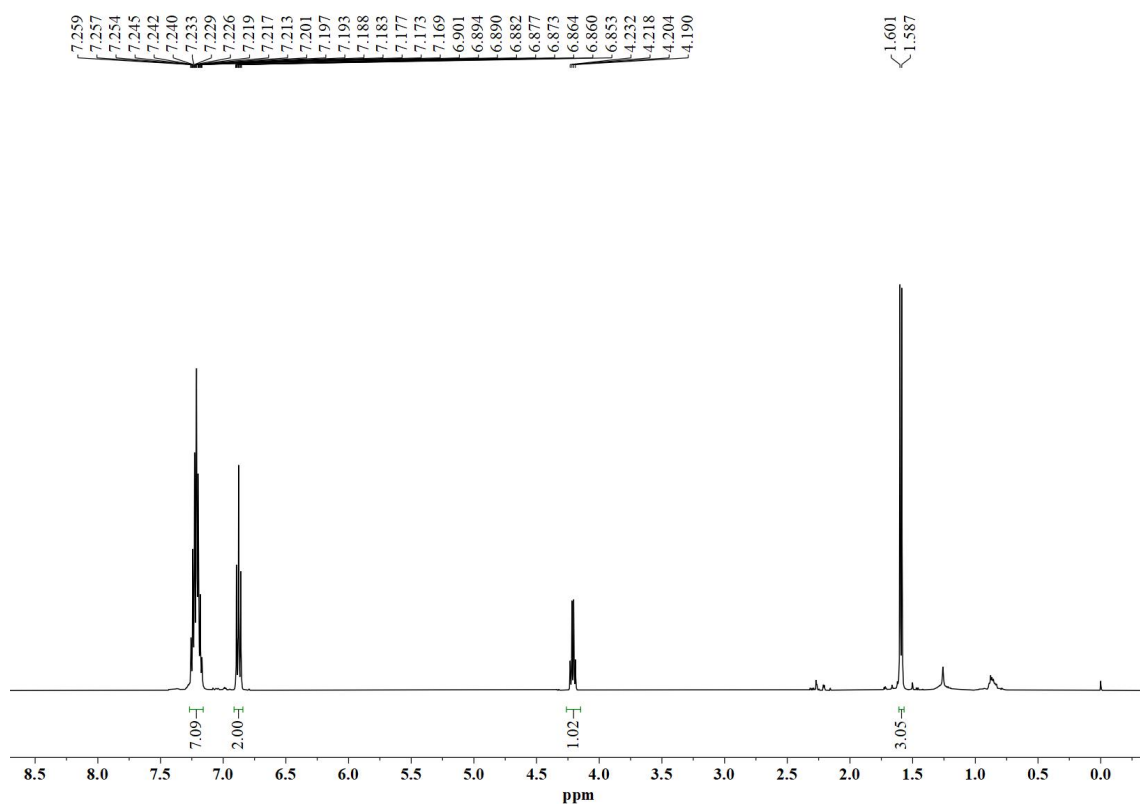

(a)  $^1\text{H}$  NMR spectrum of (4-fluorophenyl)(1-phenylethyl)sulfane in  $\text{CDCl}_3$ .

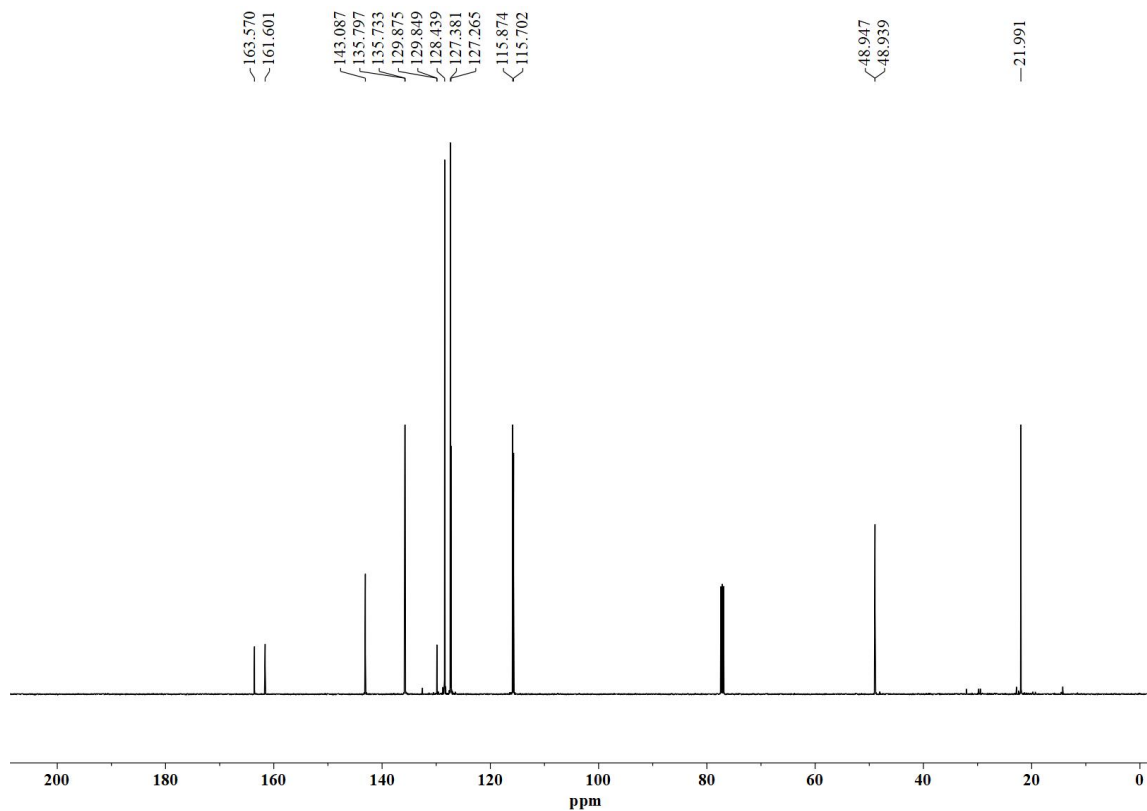

(b)  $^{13}\text{C}$  NMR spectrum of (4-fluorophenyl)(1-phenylethyl)sulfane in  $\text{CDCl}_3$ .

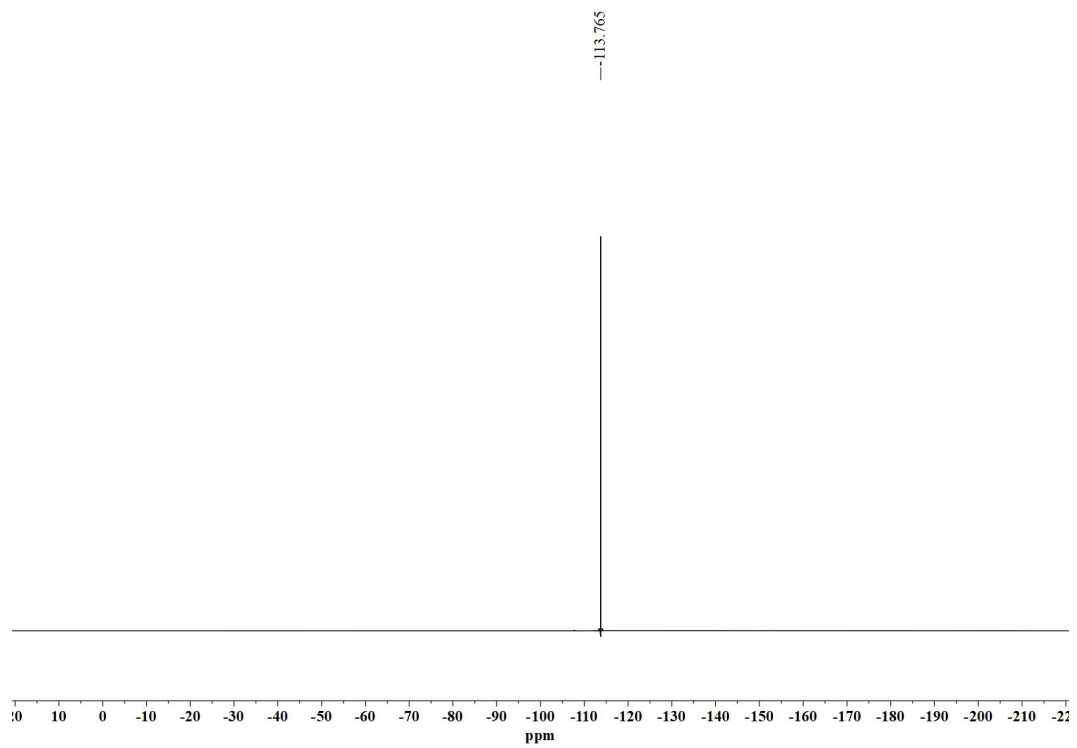

(c)  $^{19}\text{F}$  NMR spectrum of (4-fluorophenyl)(1-phenylethyl)sulfane in  $\text{CDCl}_3$ .

Figure S24. NMR spectra of (4-bromophenyl)(1-phenylethyl)sulfane.

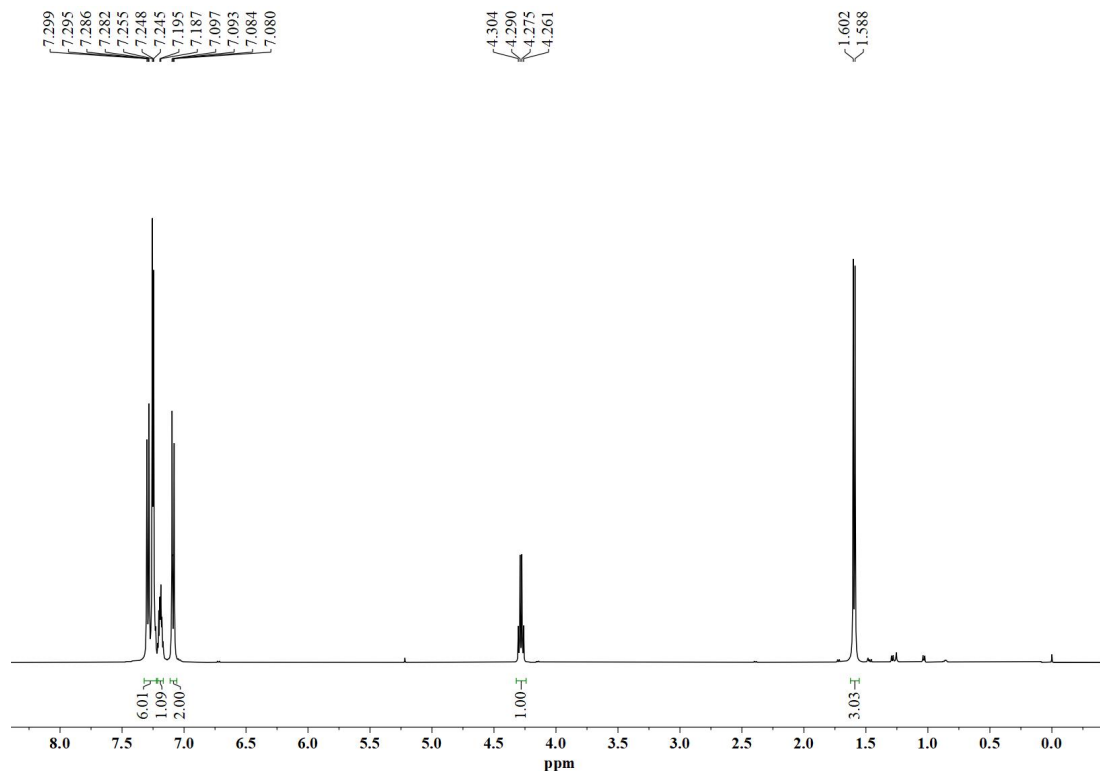

(a)  $^1\text{H}$  NMR spectrum of (4-bromophenyl)(1-phenylethyl)sulfane in  $\text{CDCl}_3$ .

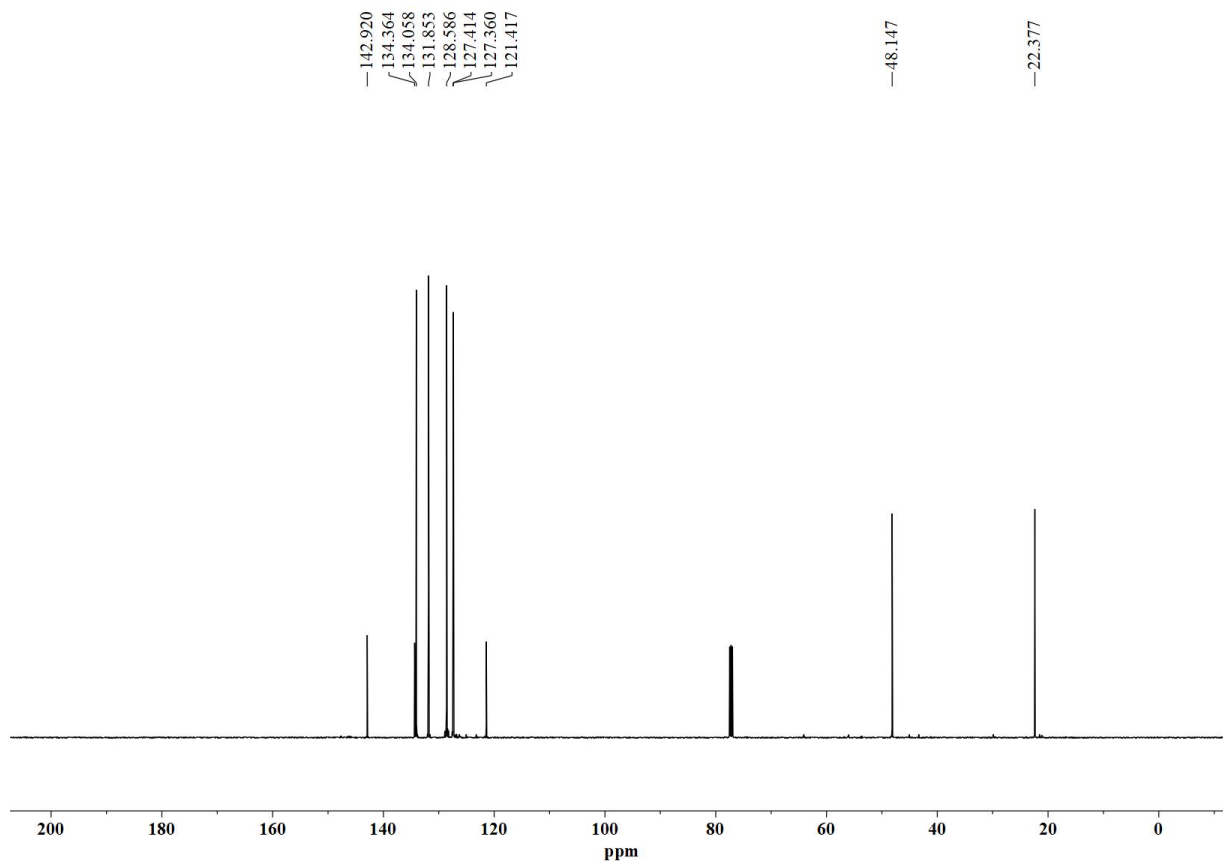

(b)  $^{13}\text{C}$  NMR spectrum of (4-bromophenyl)(1-phenylethyl)sulfane in  $\text{CDCl}_3$ .



Figure S25. NMR spectra of (4-chlorophenyl)(1-phenylethyl)sulfane.

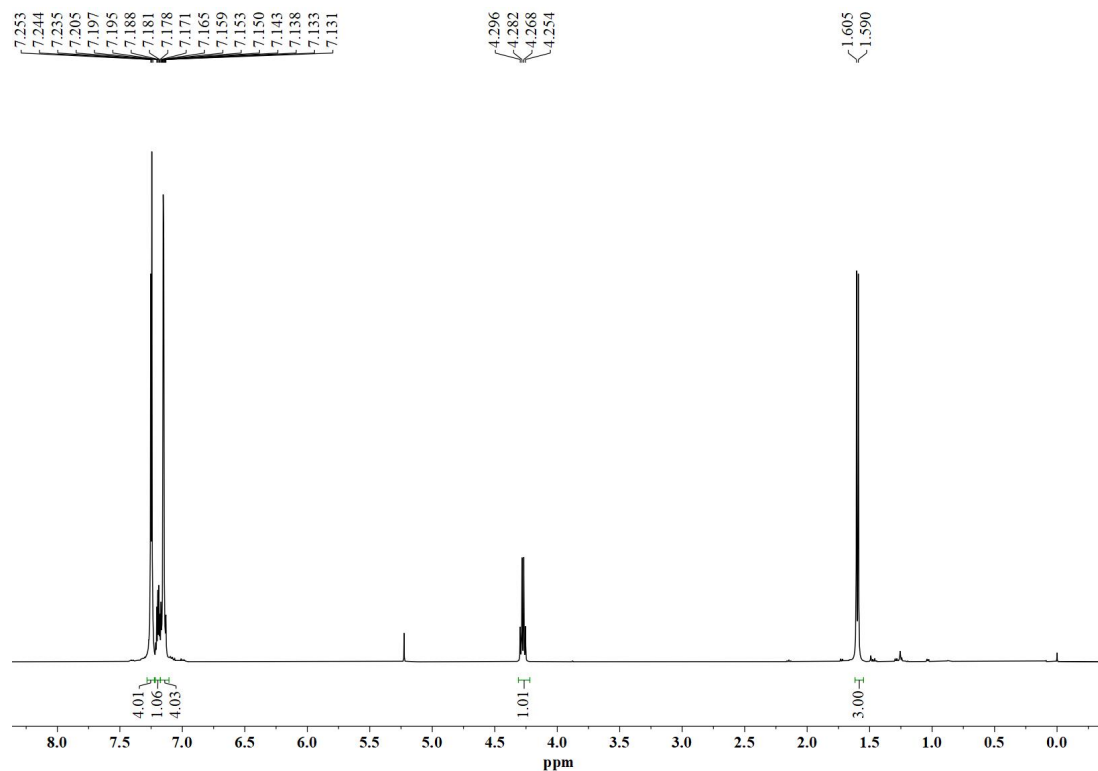

(a)  $^1\text{H}$  NMR spectrum of (4-chlorophenyl)(1-phenylethyl)sulfane in  $\text{CDCl}_3$ .

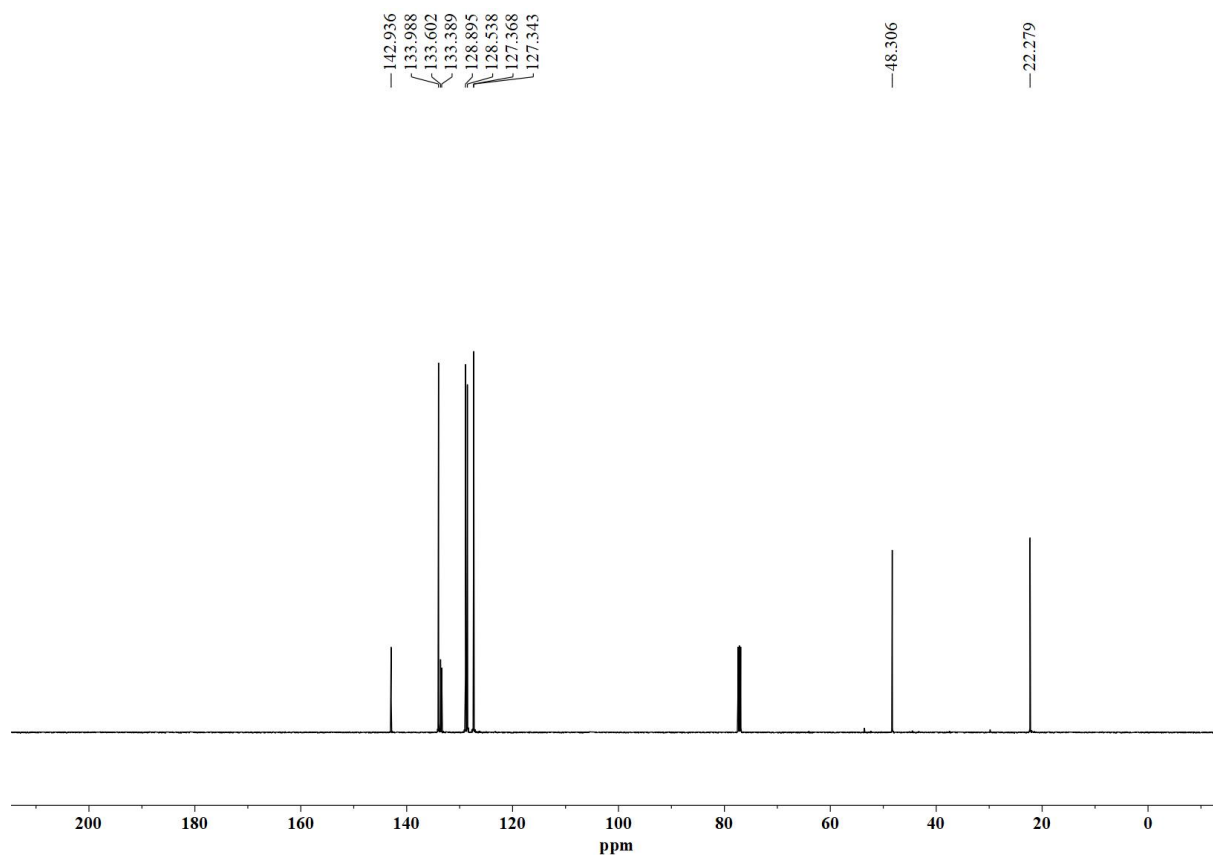

(b)  $^{13}\text{C}$  NMR spectrum of (4-chlorophenyl)(1-phenylethyl)sulfane in  $\text{CDCl}_3$ .

Figure S26. NMR spectra of (3-chlorophenyl)(1-phenylethyl)sulfane.

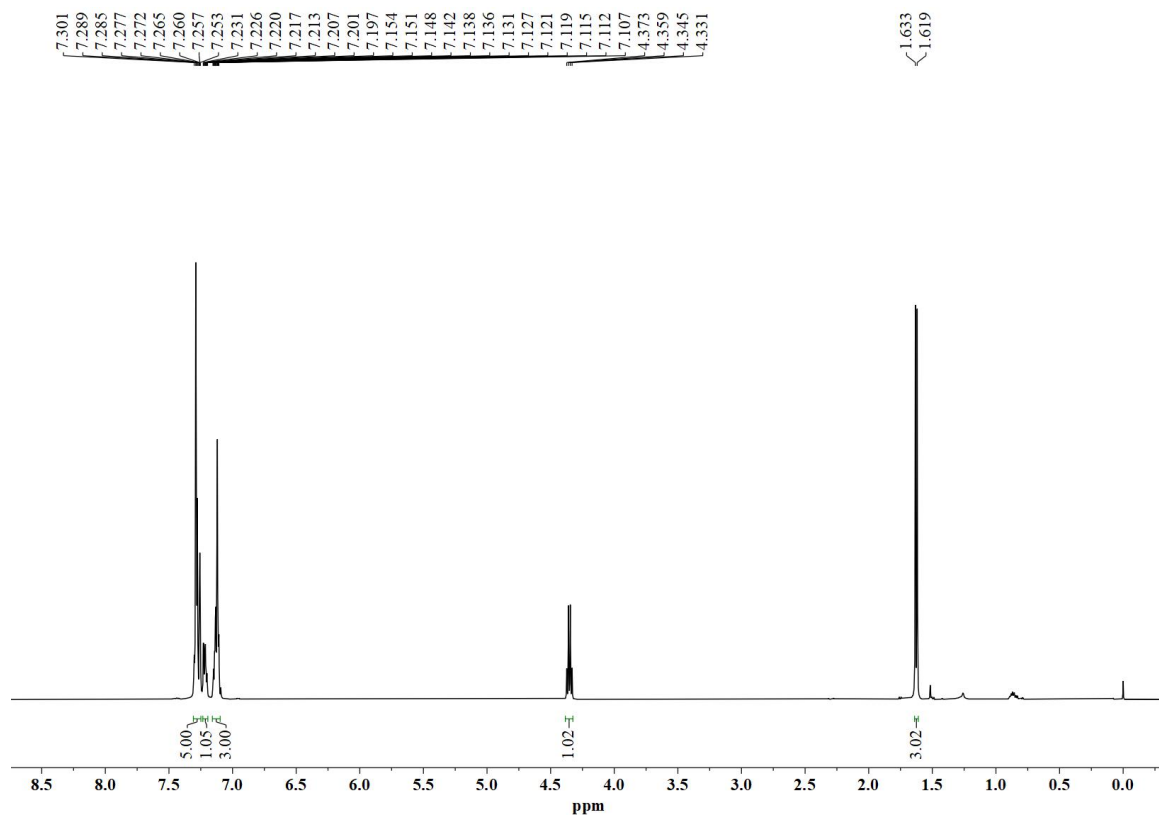

(a)  $^1\text{H}$  NMR spectrum of (3-chlorophenyl)(1-phenylethyl)sulfane in  $\text{CDCl}_3$ .

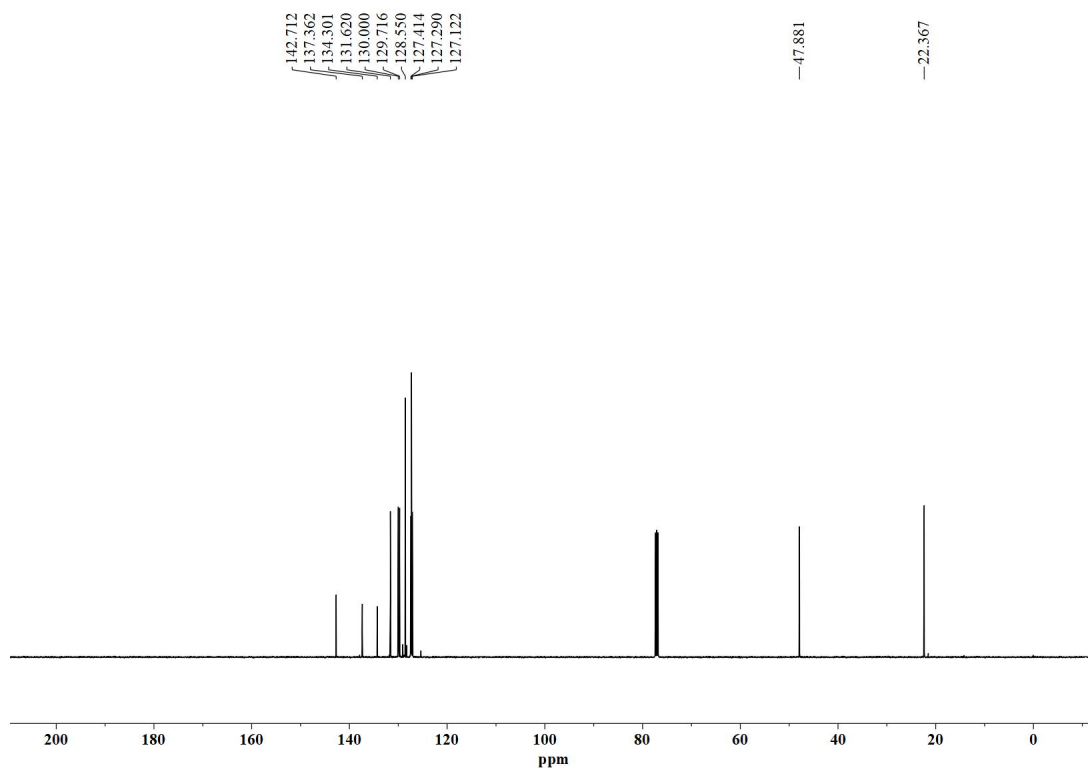

(b)  $^{13}\text{C}$  NMR spectrum of (3-chlorophenyl)(1-phenylethyl)sulfane in  $\text{CDCl}_3$ .

Figure S27. NMR spectra of (2-chlorophenyl)(1-phenylethyl)sulfane.

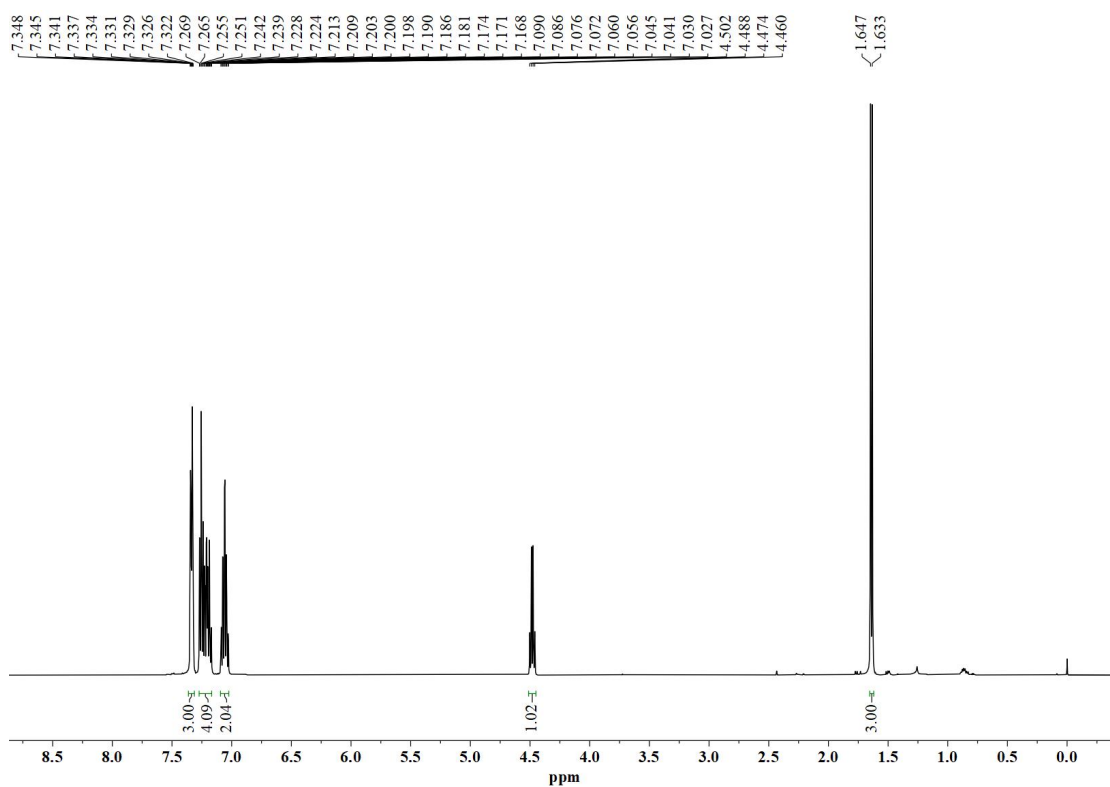

(a)  $^1\text{H}$  NMR spectrum of (2-chlorophenyl)(1-phenylethyl)sulfane in  $\text{CDCl}_3$ .

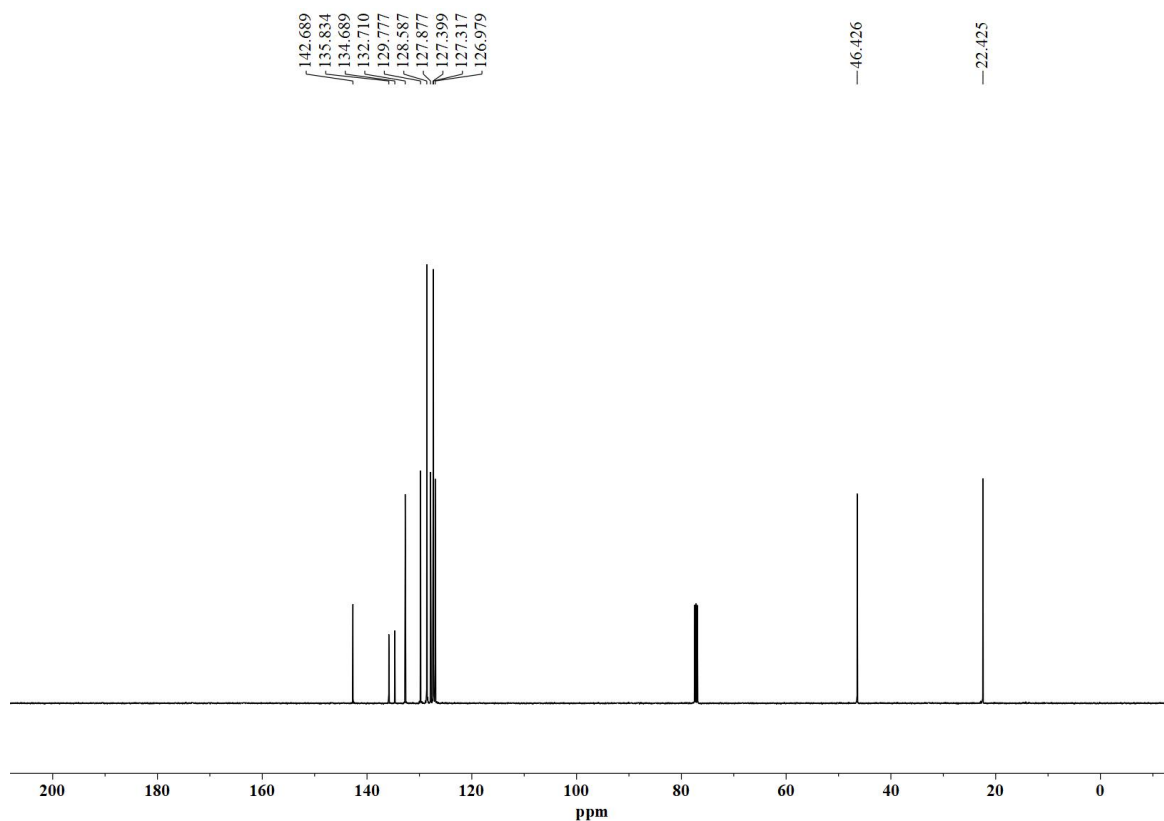

(b)  $^{13}\text{C}$  NMR spectrum of (2-chlorophenyl)(1-phenylethyl)sulfane in  $\text{CDCl}_3$ .

Figure S28. NMR spectra of (1-phenylethyl)(p-tolyl)sulfane.

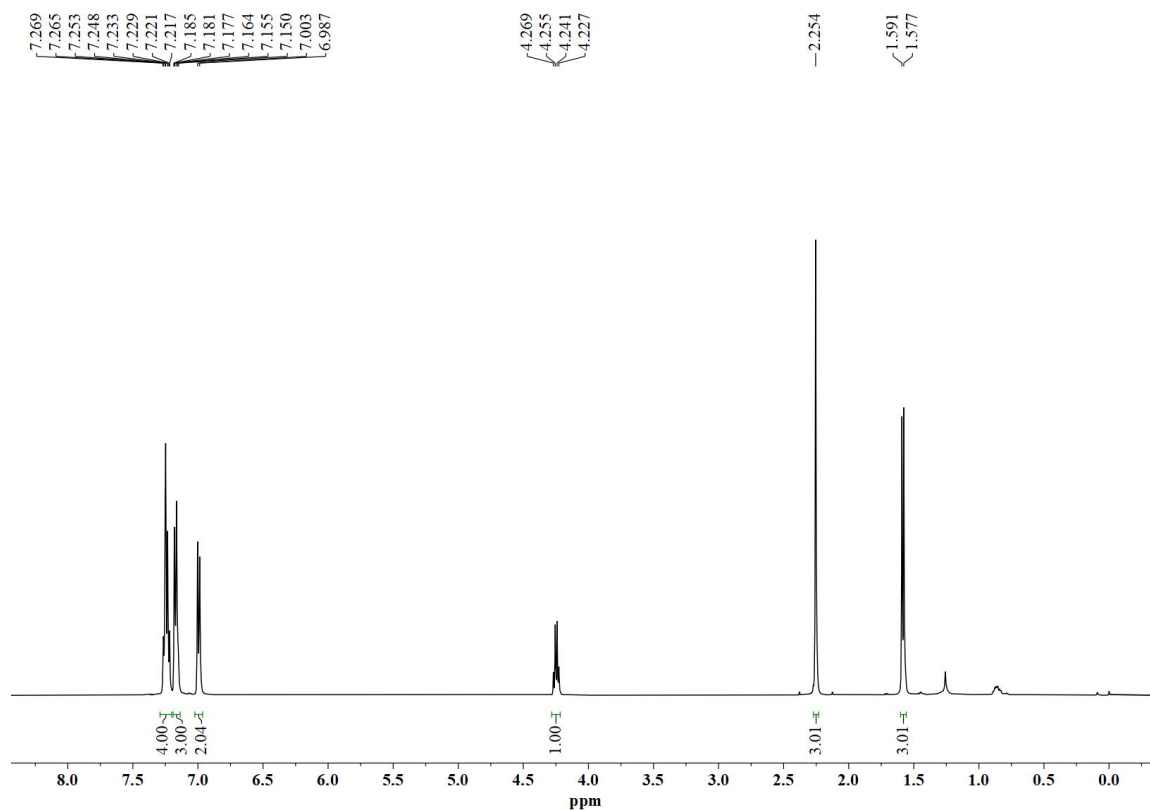

(a)  $^1\text{H}$  NMR spectrum of (1-phenylethyl)(p-tolyl)sulfane in  $\text{CDCl}_3$ .

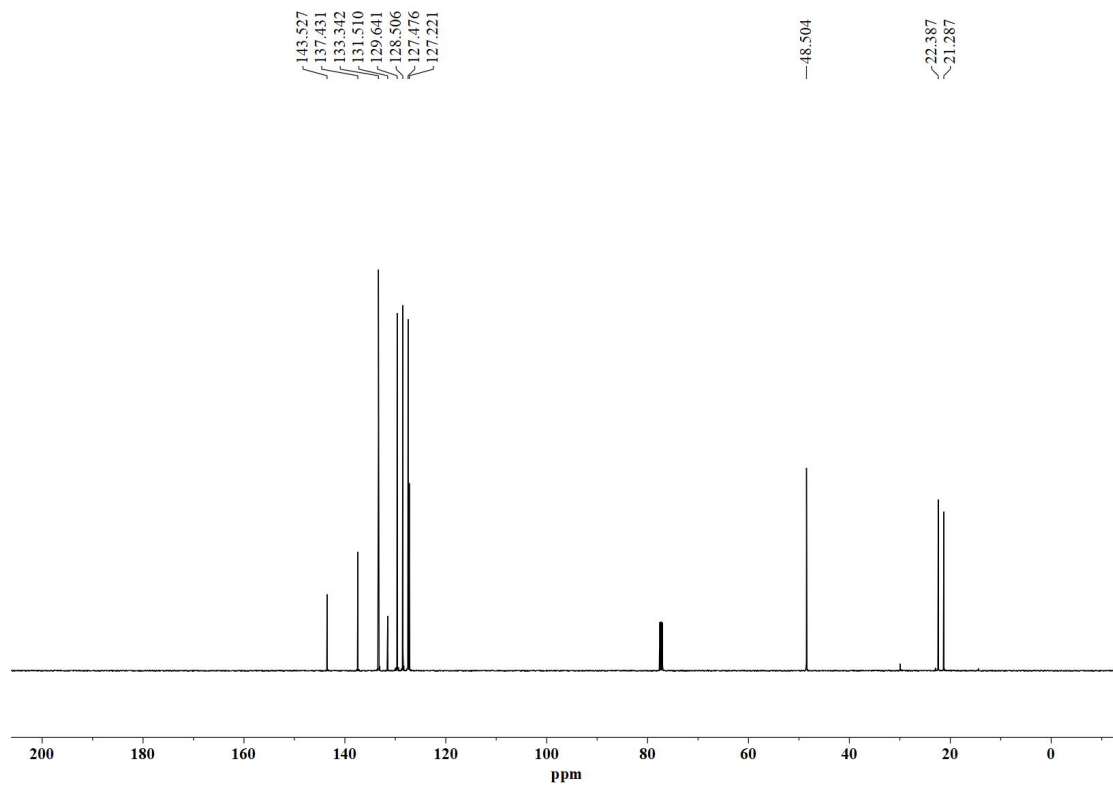

(b)  $^{13}\text{C}$  NMR spectrum of (1-phenylethyl)(p-tolyl)sulfane in  $\text{CDCl}_3$ .

**Figure S29.** NMR spectra of (4-methoxyphenyl)(1-phenylethyl)sulfane.

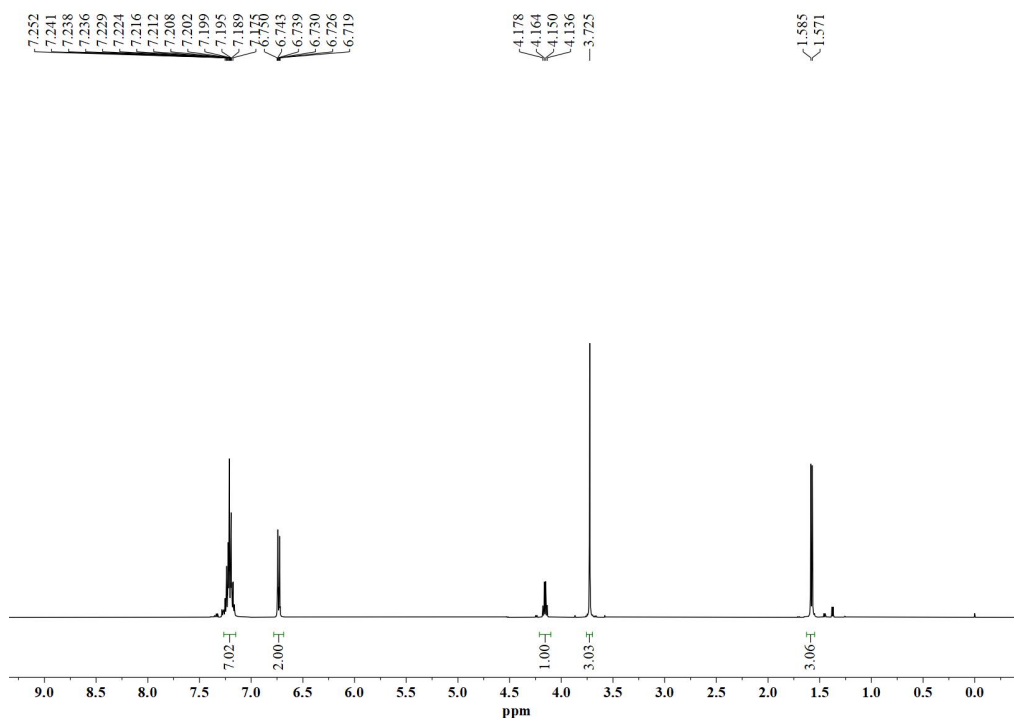

(a)  $^1\text{H}$  NMR spectrum of (4-methoxyphenyl)(1-phenylethyl)sulfane in  $\text{CDCl}_3$ .

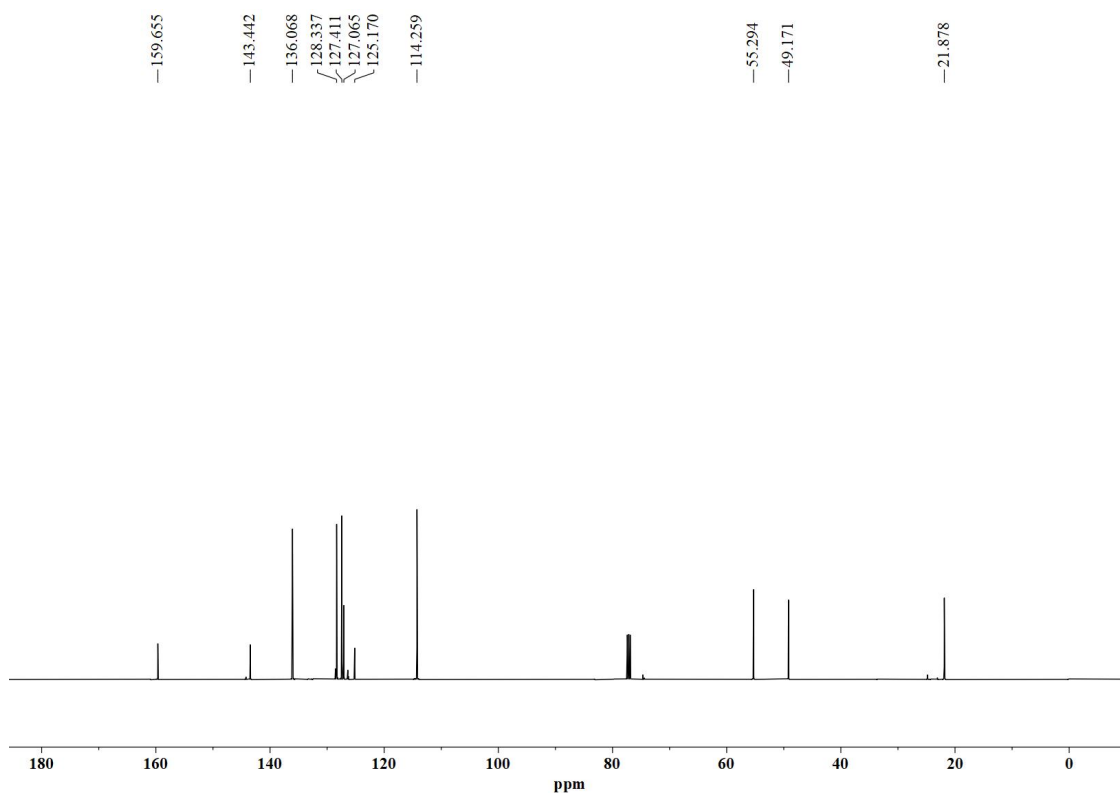

(b)  $^{13}\text{C}$  NMR spectrum of (4-methoxyphenyl)(1-phenylethyl)sulfane in  $\text{CDCl}_3$ .

**Figure S30.** Spectroscopic data (HPLC trace).

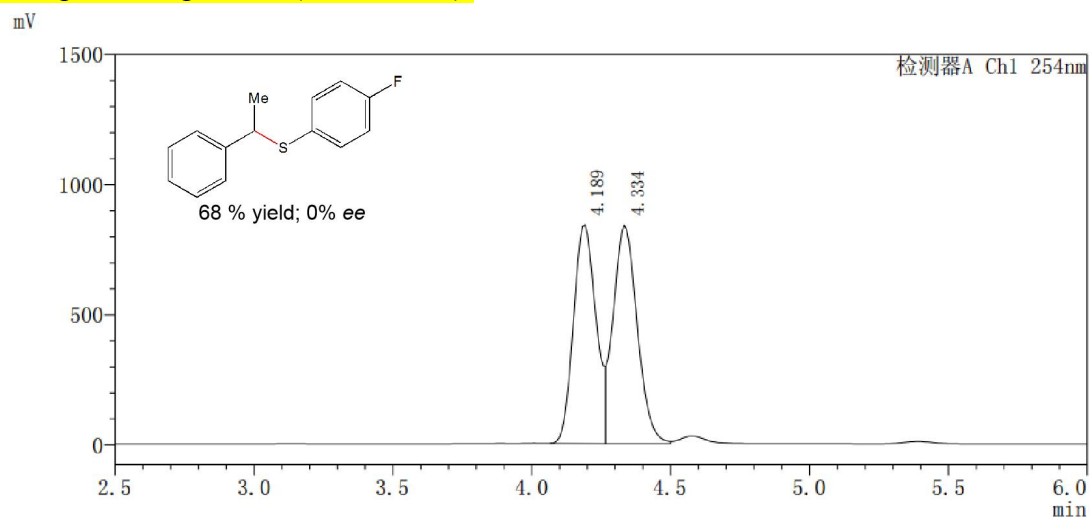

PDA Ch1 254 nm

| Peak# | Resolution time | Area    | Height  | Concentration % |
|-------|-----------------|---------|---------|-----------------|
| 1     | 4.189           | 4831633 | 840985  | 49.155          |
| 2     | 4.334           | 4997653 | 839813  | 50.845          |
| Total |                 | 9829286 | 1680797 | 100             |

**Figure S31.** NMR data and spectra of the isolated ether.

$^1\text{H}$  NMR (500 MHz, Chloroform-*d*)  $\delta$  7.39-7.33 (m, 7H), 7.29-7.25 (m, 3H), 4.90 (q,  $J = 6.5$  Hz, 2H), 1.50 (d,  $J = 6.5$  Hz, 6H).  $^{13}\text{C}$  NMR (126 MHz, Chloroform-*d*)  $\delta$  145.82, 128.53, 127.51, 125.40, 70.45, 25.18.

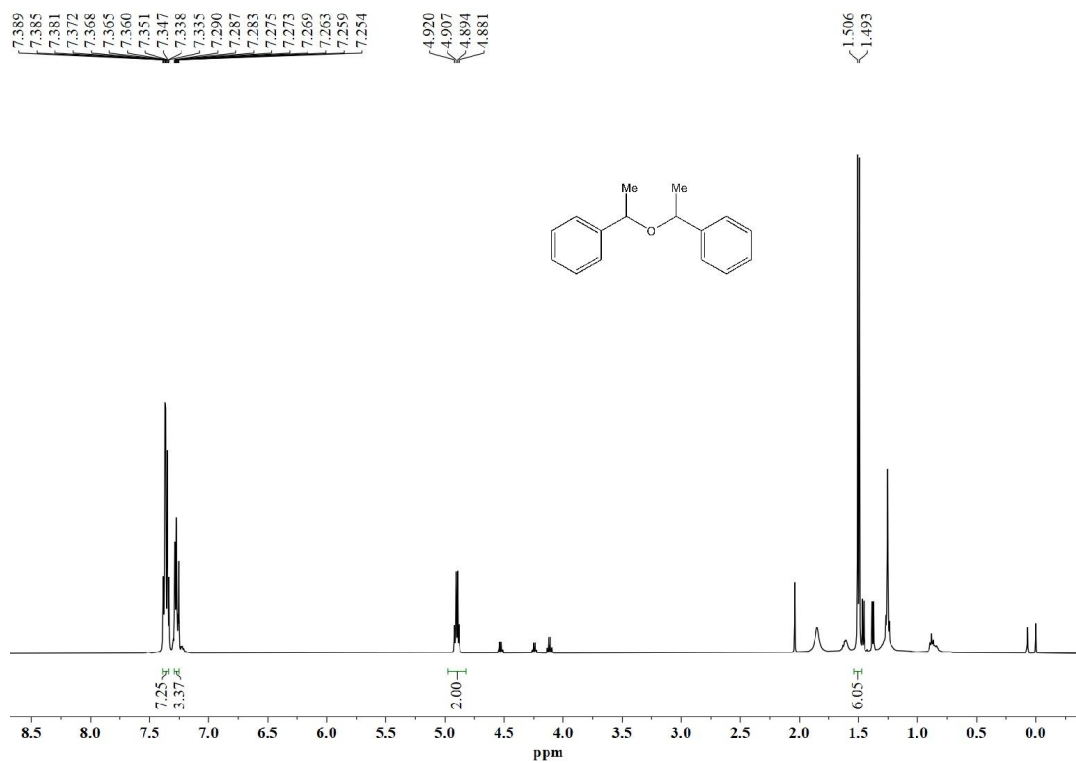

(a)  $^1\text{H}$  NMR spectrum of the isolated ether in  $\text{CDCl}_3$ .

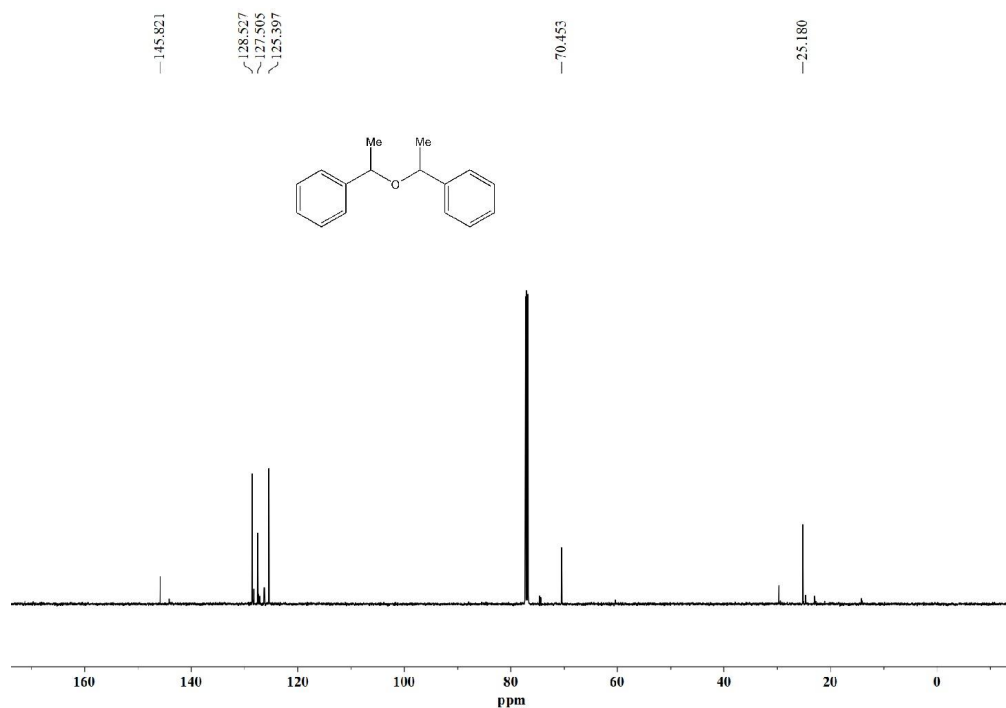

(b)  $^{13}\text{C}$  NMR spectrum of the isolated ether in  $\text{CDCl}_3$ .

**Reference:**

[1] Y. Leng, J. Wang, D. R. Zhu, X. Q. Ren, H. Q. Ge and L. Shen, *Angew. Chem. Int. Ed.*, 2009, **48**, 168-171.
